23 characteristic of mature native cartilage. Combining a Design of Experiments approach and  
24 secreted reporter cells in 3D aggregate culture enabled a high-throughput platform that can be  
25 used to identify more optimal physiological culture parameters for chondrogenesis.

## 26 **INTRODUCTION**

27 Osteoarthritis (OA) is the most common degenerative musculoskeletal disease and is projected  
28 to increase in prevalence<sup>2,3</sup>. OA is characterized by progressive degeneration of articular  
29 cartilage in the joints of the hands, knees, and hip due to an imbalance of cartilage anabolism  
30 and catabolism<sup>2,3</sup>. Articular cartilage is a form of specialized connective tissue, primarily  
31 composed of type II collagen, water, and proteoglycans with sparsely distributed  
32 chondrocytes<sup>4</sup>. Cartilage has limited healing and regenerative abilities given that its avascular  
33 nature limits access to circulating progenitor cells following physical insult<sup>4,5</sup>. Currently, there  
34 are no disease-modifying treatments for OA<sup>2,5</sup>. Available therapeutics offer short-lived relief of  
35 acute symptoms and do not prevent endpoint joint damage, therefore there is a strong need  
36 for the development of new disease-modifying therapeutics<sup>2,5,6</sup>.

37 Tissue engineering of cartilage has the potential to revolutionize the field by providing  
38 improved *in vitro* models for drug discovery and/or a biological replacement<sup>6</sup>. Tissue  
39 engineering incorporates the use of components such as cells, scaffolds, growth factors, and  
40 physical stimulation to generate biomimetic tissue<sup>7</sup>. However, tissue engineering of cartilage  
41 has been hampered by an inability to recapitulate the properties of native cartilage tissue,  
42 which we hypothesize is primarily due to insufficient type II collagen production. Whereas 90-  
43 95% of collagen in native tissue is type II collagen, several studies have reported much lower  
44 type II collagen levels in engineered tissue with values hovering around 20% despite

45 modifications to increase collagen deposition<sup>6,8-10</sup>. We postulate that part of this deficiency in  
46 type II collagen is due to sub-optimal formulation of the culture medium used for cartilage  
47 engineering *in vitro*.

48         Differentiation media traditionally used for chondrocyte cell culture was noted to lack  
49 several micronutrients which are known to be physiologically essential for a host of biological  
50 processes<sup>6</sup>. Although the specific roles that some of these micronutrients have in  
51 chondrogenesis remain undefined, there are several findings that point towards these  
52 biomolecules having significant effects on cartilage generation and maintenance<sup>6,11-16</sup>. We  
53 hypothesize the addition of these vitamins and minerals to basal differentiation medium will  
54 promote type II collagen production *in vitro* and better mimic the physiological environment.

55         A Design of Experiments (DoE) approach was implemented in this study to screen  
56 different combinations of vitamins and minerals. DoE is a statistical technique that facilitates  
57 systematic optimization by producing experimental design models to study interactions of  
58 multiple factors on a desired outcome or response. DoE allows for a multi-factor, rather than a  
59 one-factor approach, that evaluates synergistic effects, and can predict optimal conditions  
60 while reducing the burden of conducting repetitive experiments. DoE has provided significant  
61 benefits to other fields of engineering and biotechnology but has rarely been used in cartilage  
62 tissue engineering and regenerative medicine<sup>17,18</sup>.

63         In this study, we have identified, for the first time, an optimal supplementation of  
64 physiologically necessary micronutrients to chondrogenic media, using a streamlined platform  
65 that includes a type II collagen promoter-driven *Gaussia* luciferase construct in primary rabbit  
66 articular chondrocytes combined with a DoE approach. This optimized chondrogenic media

67 significantly enhances type II collagen expression in primary rabbit chondrocytes cultured in 3D  
68 cell aggregates and engineered cartilage sheets.

## 69 RESULTS

### 70 Stimulation of type II collagen by TGF- $\beta$ 1 in primary rabbit chondrocytes.

71 To characterize the TGF- $\beta$ 1 response of engineered type II collagen promoter-driven *Gaussia*  
72 luciferase reporter (COL2A1-Gluc) in primary rabbit chondrocytes, cells were cultured in 3D  
73 aggregates in defined chondrogenic media supplemented with 0-10 ng/ml of TGF- $\beta$ 1, a known  
74 stimulator of type II collagen<sup>6,19,20</sup>. Conditioned media, containing the secreted *Gaussia*  
75 luciferase, was assayed for luminescence over three weeks. Dose response curves were  
76 generated from luminescence data at Day 7 (**Fig. 1a**) and Day 21 (**Fig. 1b**). As seen in Figure 1,  
77 there was a dose dependent increase in luminescence with a calculated 50% effective  
78 concentration (EC50) of 0.17ng/ml and 0.10ng/ml for Day 7 and Day 21 respectively.

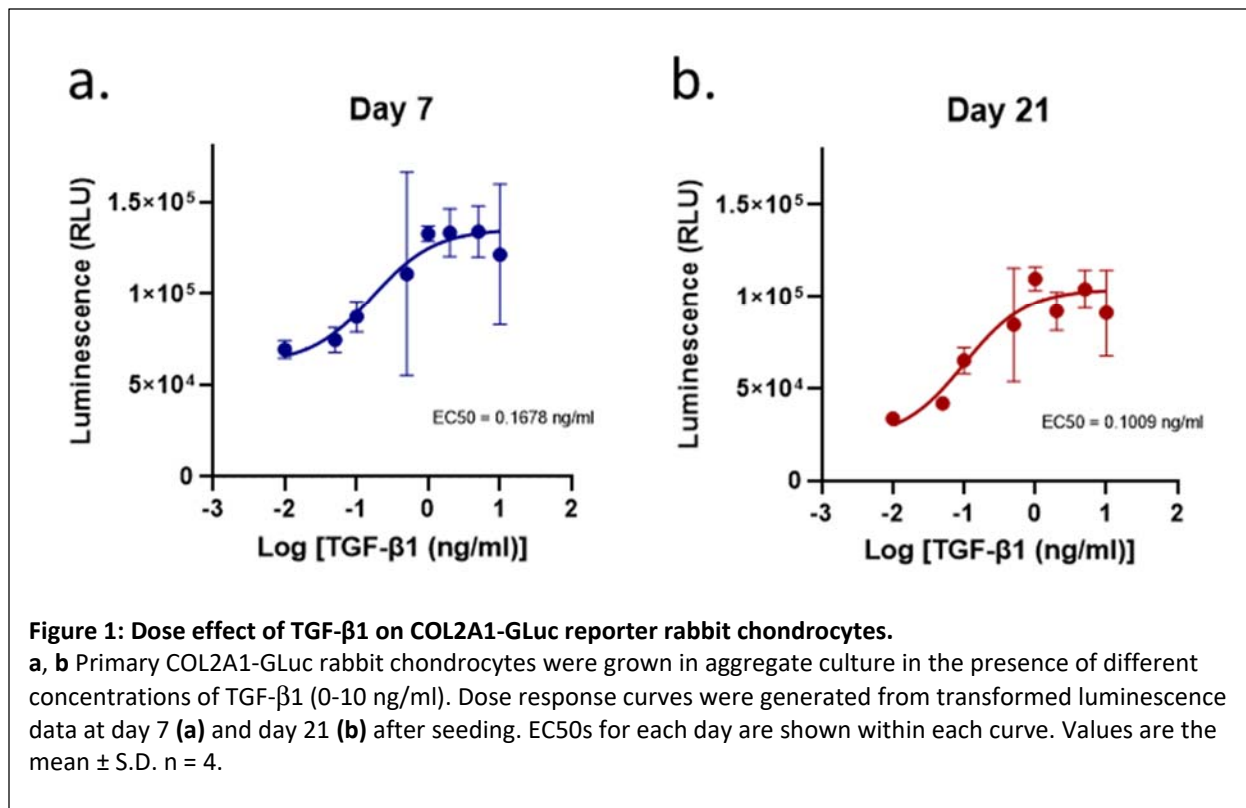

79

80 **Response Surface Model and subsequent ANOVA analysis identified interactions between**  
 81 **micronutrients that increased type II collagen promoter-driven expression of *Gaussia***  
 82 **luciferase.**

83 To identify potential interactions between factors and their effect on type II collagen  
 84 expression, COL2-GLuc rabbit chondrocytes were seeded in 3D aggregate culture with DoE  
 85 generated combinations of vitamins and minerals; media was sampled and replaced over three  
 86 weeks. Combinations and concentrations are defined by the parameters set in the response  
 87 surface model (**Table 1**) and are listed in **supplemental Table 2**.

88

**Table 1: Concentrations of micronutrients absent in chondrogenic media with input parameters for DoE screen.**

| Term | Name           | Abbreviation | Manufacturer      | Maximal Serum Concentration <sup>1</sup> | Minimum Maximum ( µg/ml) |          |
|------|----------------|--------------|-------------------|------------------------------------------|--------------------------|----------|
|      |                |              |                   |                                          |                          |          |
| A    | Linolenic Acid | ALA          | Sigma-Aldrich     | 54 mg/L                                  | 1.0E-15                  | 270.43   |
| B    | Chromium       | Cr           | Sigma-Aldrich     | 28 µg/L                                  | 1.0E-15                  | 0.14     |
| C    | Cobalt         | Co           | Sigma-Aldrich     | 0.9 µg/L                                 | 1.0E-15                  | 4.52E-03 |
| D    | Copper         | Cu           | Sigma-Aldrich     | 670 µg/L                                 | 1.0E-15                  | 3.35     |
| E    | Iodine         | I            | Alfa-Aesar        | 92 µg/L                                  | 1.0E-15                  | 0.46     |
| F    | Manganese      | Mn           | Sigma-Aldrich     | 12 µg/L                                  | 1.0E-15                  | 0.06     |
| G    | Molybdenum     | Mo           | Sigma-Aldrich     | 2.0 µg/L                                 | 1.0E-15                  | 0.01     |
| H    | Thyroxine      | T4           | Sigma-Aldrich     | 17 ng/L                                  | 1.0E-15                  | 0.12     |
| J    | Vitamin A      | Vit A        | Alfa-Aesar        | 780 µg/L                                 | 1.0E-15                  | 0.08     |
| K    | Vitamin B12    | Vit B12      | Sigma-Aldrich     | 914 ng/L                                 | 1.0E-15                  | 4.56E-03 |
| L    | Biotin         | Vit B7       | Alfa-Aesar        | 3004 ng/L                                | 1.0E-15                  | 0.01     |
| M    | Vitamin D      | Vit D        | Selleck Chemicals | 86 ng/L                                  | 1.0E-15                  | 4.31E-04 |
| N    | Vitamin E      | Vit E        | Sigma-Aldrich     | 18.4 mg/L                                | 1.0E-15                  | 91.84    |
| O    | Vitamin K      | Vit K        | Sigma-Aldrich     | 2.2 µg/L                                 | 1.0E-15                  | 0.01     |
| P    | Zinc           | Zn           | Alfa-Aesar        | 1.2 mg/L                                 | 1.0E-15                  | 5.99     |

<sup>1</sup> Note: References for serum concentrations: 7, 10-11, 13-15, 40, 41, 43 62-71

89 In the surface response model, each vitamin or mineral is introduced as an independent  
 90 variable and is defined in Design-Expert (V.12, StatEase) as a model term. Luminescence signal

91 over time, cumulative luminescence and resazurin data are defined as responses. The response  
92 surface study was designed as a quadratic model. **Fig. 2a-b** shows the normal probability plot  
93 after the data was transformed to fit the quadratic model for week 2 and week 3. The residuals  
94 are the deviation of each sample compared to its predicted value. For the residuals to be  
95 normally distributed they must show a linear trend, indicated by the red line, with little  
96 variation outside of it. As seen in **Fig. 2a-b** the residuals are normally distributed for all  
97 timepoints.

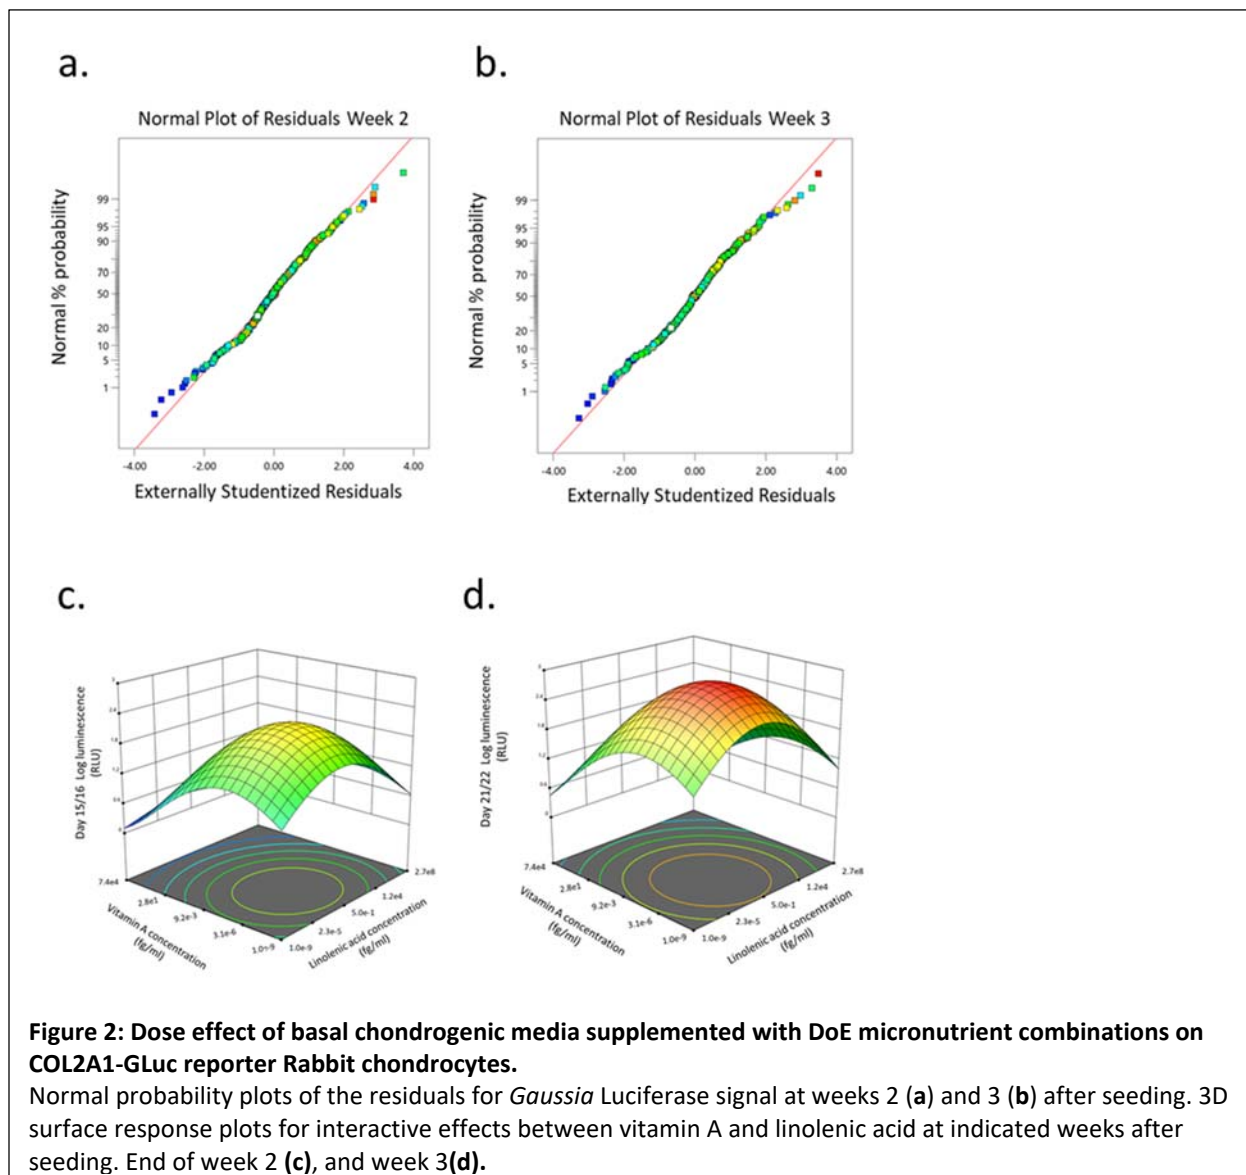

98

99 ANOVA analysis of luminescence expression for week 2 and week 3 of chondrogenesis

100 identified significant model terms, i.e. factors that have significant effects on the responses

101 (Table 2).

| Source             | Week 1   |          | Week 2   |          | Week 3   |          |
|--------------------|----------|----------|----------|----------|----------|----------|
|                    | F- Value | P-Value  | F- Value | P-Value  | F- Value | P-Value  |
| Model              | 2.480    | < 0.0001 | 2.730    | < 0.0001 | 2.491    | < 0.0001 |
| ALA                | 9.980    | < 0.0001 | 30.420   | < 0.0001 | 33.971   | 0.001    |
| Cu                 | 11.020   | 0.001    | 13.760   | 0.000    | 10.709   | 0.001    |
| Vit A              | 42.650   | < 0.0001 | 46.190   | < 0.0001 | 30.202   | <0.0001  |
| ALA <sup>2</sup>   | 3.390    | 0.067    | 10.370   | 0.002    | 11.496   | 0.001    |
| Cu <sup>2</sup>    | 3.540    | 0.061    | 4.840    | 0.029    | 4.534    | 0.034    |
| Vit A <sup>2</sup> | 32.520   | < 0.0001 | 36.430   | < 0.0001 | 23.391   | <0.0001  |
| ALA & Vit E        | 3.770    | 0.054    | 5.420    | 0.021    | 5.185    | 0.024    |
| Cr & Co            | 3.510    | 0.062    | 5.600    | 0.019    | 5.174    | 0.024    |
| Mn & Mo            | 9.980    | 0.002    | 10.790   | 0.001    | 11.034   | 0.001    |
| Co & Vit D         | 7.610    | 0.006    | 5.720    | 0.018    | 8.165    | 0.005    |
| T4 & Vit D         | 3.310    | 0.070    | 6.620    | 0.011    | 8.878    | 0.003    |
| Vit B7 & Zn        | 3.860    | 0.051    | 3.070    | 0.081    | 4.086    | 0.045    |
| Lack of Fit        | 0.592    | 0.897    | 0.416    | 0.983    | 0.515    | 0.945    |

102

103 Results of this analysis include, F-values, P-values, and lack of fit test, which indicate how well

104 the responses fit the model. As shown in **Table 2** the F- and P- values of the model, as well as

105 the lack of fit test, over the three weeks support that the model is significant and thus the

106 analysis for the associated terms is valid. **Table 2** displays model terms that were significant for

107 at least one of the timepoints indicated shown by a P-value < 0.05. Significant single terms for

108 all timepoints were linolenic acid, copper, and vitamin A. Several interactions were defined as

109 significant for at least one of the timepoints shown (orange highlighted), while others including:

110 chromium and cobalt, manganese and molybdenum, and cobalt and vitamin D were significant

111 for all timepoints.

112 To contrast these results, testing factors in one factor at a time approach previously identified  
113 basal media supplemented with cobalt, chromium, thyroxine, or Vitamin B7, as having higher  
114 luminescence at multiple concentrations as compared to basal media alone (**Supplementary**  
115 **Fig. 1a**). Combinations of these factors, with factors previously shown to have an effect<sup>6</sup>, are  
116 shown in **Supplementary Fig. 1b**. Copper and Vitamin B7 alone or in combination with each  
117 other seemingly had no effect on luminescence, ~40,000 RLU; however, in combination with  
118 thyroxine they significantly increased luminescence ~70,000 RLU as compared to basal media  
119 alone, ~40,000 RLU. This supports that there a synergistic effect between copper, biotin, and  
120 thyroxine. Furthermore, this supports the use of a Design of Experiments approach over a one  
121 factor a time approach as the DoE screen also identified factors that were significant in  
122 interactions but were not identified as individually significant.

123 Using a response surface model allows us to determine significant interactions between terms  
124 as well as determine and predict optimal concentrations of the terms within the parameters  
125 input into the initial model. 3D surface plots in **Fig. 2c-d** show the dose effect of two terms  
126 (linolenic acid and vitamin A) in relation to each other and to the response (luminescence) at  
127 week 2 (**Fig. 2c**) and week 3 (**Fig. 2d**) of chondrogenesis. During week 2 (**Fig. 2c**) there is a  
128 predicted optimal concentration for linolenic acid and vitamin A (approximately  $3 \times 10^{-6}$  fg/ml  
129 and  $5 \times 10^{-1}$  fg/ml respectively) that results in a maximal response that increases in week 3 (**Fig.**  
130 **2d**), from  $10^{1.8}$  RLU to  $10^{2.4}$  RLU, although the optimal concentrations of the terms remain the  
131 same. Interestingly, the DoE model predicts that there is an optimal concentration for these in  
132 the femtomolar range (**Fig. 2c-d**) while each of the two factors, when analyzed as sole additives,  
133 were detrimental to chondrogenesis (**Supplementary Fig. 1a**).



134 **Fig. 2c-d** is a representation of only two of the terms and a predicted optimal for each  
135 individual timepoint. Through Design-Expert, multiple terms and responses can be analyzed  
136 together to derive predicted optimal concentrations for all terms. These predicted optima  
137 account for individual responses as well interactions between terms. Out of the generated  
138 predicted optimal conditions, 5 were selected for validation, designated as conditions 12, 25,  
139 52, 72, and 89 (**Supplemental Table 2**).

140 **DoE predicted conditions improved *Gaussia* luciferase expression over basal media.**

141 To validate the Design-Expert generated predicted conditions, COL2A1-GLuc cells in aggregate  
142 culture were maintained in media supplemented with the predicted conditions (**Supplemental**  
143 **Table 2**) for three weeks. As seen in **Fig. 3a**, all conditions tested had increased luminescence  
144 over basal media control for all timepoints after day 8, which suggests that predicted conditions  
145 have an anabolic effect early in chondrogenesis. Cumulative luminescence seen in **Fig. 3b** is the  
146 sum of luminescence signal over all days in culture and confirms that increased luminescence at  
147 each timepoint results in an overall significant increase in type II collagen promoter-driven  
148 activity for all predicted conditions, with condition 25 having a higher cumulative signal of  $\sim 1 \times$   
149  $10^6$  RLU as compared to basal media,  $\sim 6 \times 10^5$  RLU, and other predicted conditions. Single day  
150 luminescence shown for day 10 (**Fig. 3c**) and day 22 (**Fig. 3d**) supports an increase in  
151 luminescence that is statistically significant for all conditions tested as compared to basal media  
152 with condition 25 having an average luminescence signal that is twice of that in basal media,  $\sim 2$   
153  $\times 10^5$  RLU vs  $1 \times 10^5$  RLU respectively, for both timepoints.

154

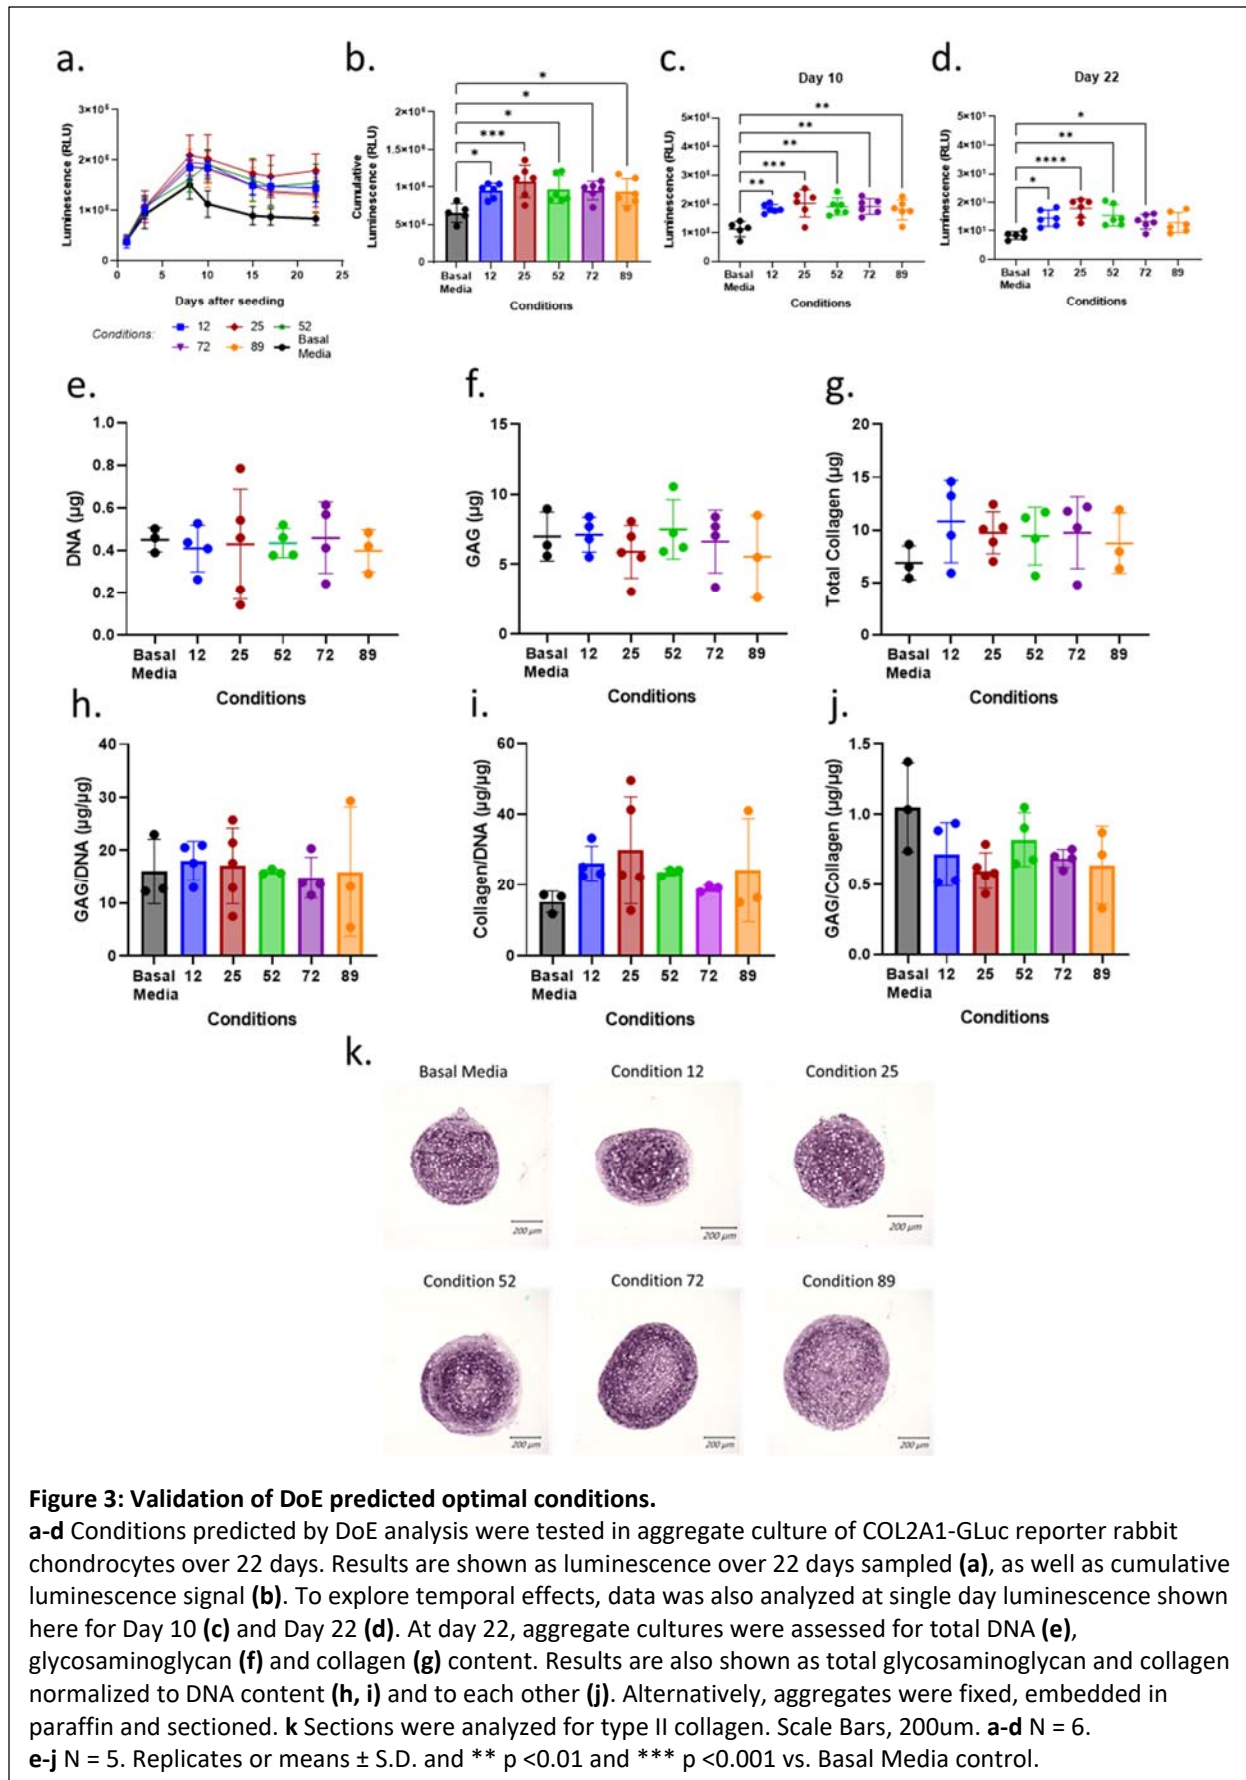

**Figure 3: Validation of DoE predicted optimal conditions.**

**a-d** Conditions predicted by DoE analysis were tested in aggregate culture of COL2A1-GLuc reporter rabbit chondrocytes over 22 days. Results are shown as luminescence over 22 days sampled (**a**), as well as cumulative luminescence signal (**b**). To explore temporal effects, data was also analyzed at single day luminescence shown here for Day 10 (**c**) and Day 22 (**d**). At day 22, aggregate cultures were assessed for total DNA (**e**), glycosaminoglycan (**f**) and collagen (**g**) content. Results are also shown as total glycosaminoglycan and collagen normalized to DNA content (**h**, **i**) and to each other (**j**). Alternatively, aggregates were fixed, embedded in paraffin and sectioned. **k** Sections were analyzed for type II collagen. Scale Bars, 200  $\mu\text{m}$ . **a-d** N = 6. **e-j** N = 5. Replicates or means  $\pm$  S.D. and \*\* p < 0.01 and \*\*\* p < 0.001 vs. Basal Media control.

156 To corroborate results seen by luminescence output, endpoint biochemical assays were  
157 performed at day 22 of the experiment to quantitate DNA, glycosaminoglycan (GAG) and total  
158 collagen content. **Fig. 3e** shows an average of  $\sim 0.4 \mu\text{g}$  of DNA per sample with no significant  
159 difference between conditions tested, which suggests that predicted conditions have no effect  
160 on cell proliferation or viability over 22 days. Total glycosaminoglycan content is shown in **Fig.**  
161 **3f** and as amount per microgram of DNA in **Fig. 3h**. As expected, DoE predicted conditions did  
162 not significantly affect glycosaminoglycan production over 22 days, although condition 89  
163 shows large variability between samples as compared to other conditions. Quantification of  
164 total collagen, as seen in **Fig. 3g** shows an increase in aggregates cultured in predicted  
165 conditions to  $\sim 10 \mu\text{g}$  over basal media ( $\sim 6 \mu\text{g}$ ). However, when normalized to micrograms of  
166 DNA (**Fig. 3i**) only conditions 12, 25 and 89, show increased collagen as compared to aggregates  
167 cultured in basal media with significant variability within each group. Glycosaminoglycan to  
168 collagen ratio (**Fig. 3j**) further support an increase in collagen with no change in GAG content.  
169 Immunohistochemistry for type II collagen (**Fig. 3k**) confirms the presence of type II collagen for  
170 cell aggregates in all conditions at day 22 with similar staining pattern across all conditions.  
171 **No single factor from optimized condition 25 significantly impacts type II collagen stimulation**  
172 **in primary rabbit chondrocytes.**  
173 When using a one factor at a time approach, thyroxine (T4) was required in the tested  
174 combinations for type II collagen stimulation over basal media (**Supplementary Fig 1b**). To test  
175 if one factor was solely responsible for the enhancement in luminescence seen over basal  
176 media, aggregates were cultured in the predicted DoE condition 25, or combinations where one  
177 factor was removed from condition 25 for 22 days. **Fig. 4a** represents luminescence data for all

178 days tested with basal media shown by a thicker black line and complete condition 25 shown by  
179 the thicker red line. All conditions had increased luminescence as compared to basal media  
180 after day 8. For statistical analysis, day 10 luminescence (**Fig. 4b**) is shown for all conditions  
181 tested.  
182

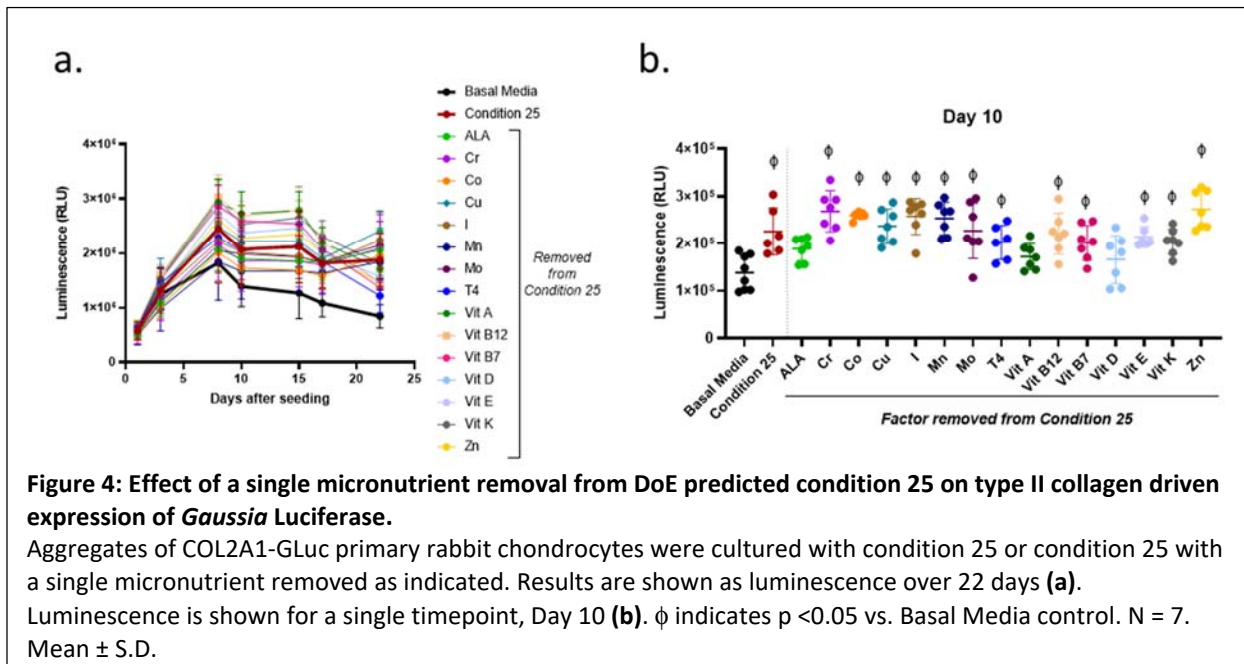

183 Aggregates cultured in all conditions had increased luminescence, however, effects by  
184 condition 25 with Linolenic acid, vitamin A or with vitamin D removed, were not statistically  
185 significant as compared to basal media, suggestive of a major role for these biomolecules.  
186 Formulations where any of the other factors were removed from Condition 25 had significant  
187 increases in luminescence as compared to basal media alone. There was no statistical  
188 significance between any of the conditions with a single factor removed as compared to  
189 complete condition 25. These results are evidence that no single factor within DoE predicted  
190 condition 25 is solely responsible for the higher stimulation of type II collagen promoter activity  
191 observed.

192 **Relative concentrations of vitamins and minerals, regardless of absolute concentrations, in**  
193 **DoE predicted conditions play a significant role in type II collagen stimulation in primary**  
194 **rabbit chondrocytes.**

195 To determine if ratios, regardless of the absolute concentration, within the DoE predicted  
196 conditions were sufficient for type II collagen stimulation, aggregate cultures were treated with  
197 the DoE predicted conditions at the concentrations given or at 1/15<sup>th</sup> of the predicted  
198 concentrations. Statistical analysis of luminescence at Day 10 (**Fig. 5a**) and Day 17 (**Fig. 5b**)  
199 showed no significant differences between the conditions at 1x or 1/15x of their DoE predicted  
200 concentrations.

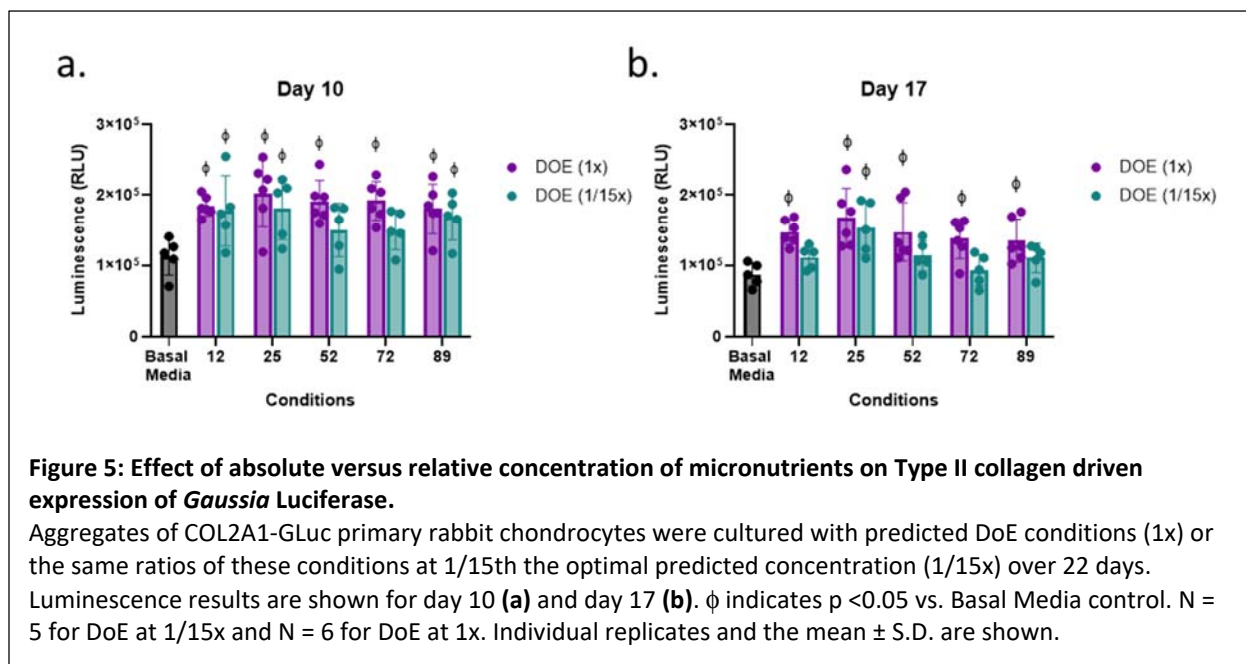

201  
202 Interestingly, while aggregates cultured at the DoE predicted conditions had significantly higher  
203 luminescence as compared to those in basal media, aggregates cultured in most conditions at  
204 1/15<sup>th</sup> did not. Only condition 25 at 1/15<sup>th</sup> the concentration showed a significantly higher level  
205 of luminescence at both days vs. Basal Media,  $\sim 1.5$  to  $\sim 1.7 \times 10^5$  RLU vs  $\sim 1 \times 10^5$  RLU. This

206 suggests that the combinatorial effect of the vitamins and minerals plays a significant role in  
207 type II collagen stimulation in primary rabbit chondrocytes, but concentrations as predicted by  
208 the DoE are optimal for type II collagen stimulation.

209 **DoE predicted condition 25 stimulates type II collagen in tissue engineered rabbit cartilage.**

210 To determine if condition 25, the best performing DoE predicted condition, could have an effect  
211 in cartilage tissue engineering, we cultured COL2A1-GLuc or Non-transduced (NonTr) primary  
212 rabbit chondrocytes in custom, 3D printed bioreactors adapted from Whitney GA, et al. shown  
213 in **Fig 6a-b** over 22 days<sup>21,22</sup>.

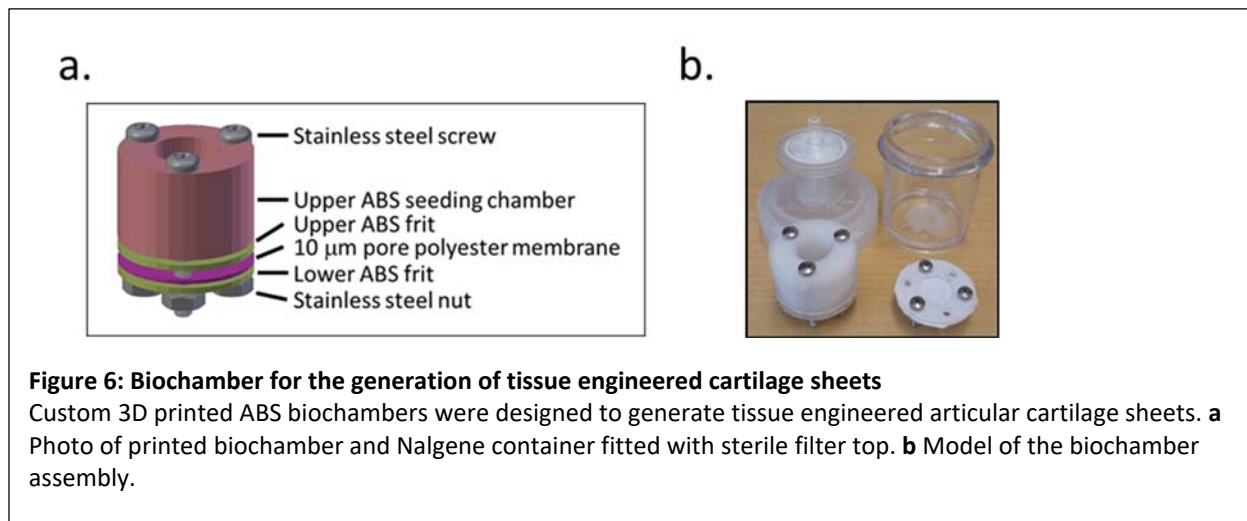

214

215 At the end of this culture period, 1.2cm<sup>2</sup> cartilage sheets were collected as shown in **Fig. 7a**.

216 Over the 22 days bioreactors housing COL2A1-Gluc cells were regularly sampled for

217 luminescence. **Fig. 7b** represents luminescence data for all days tested.

218

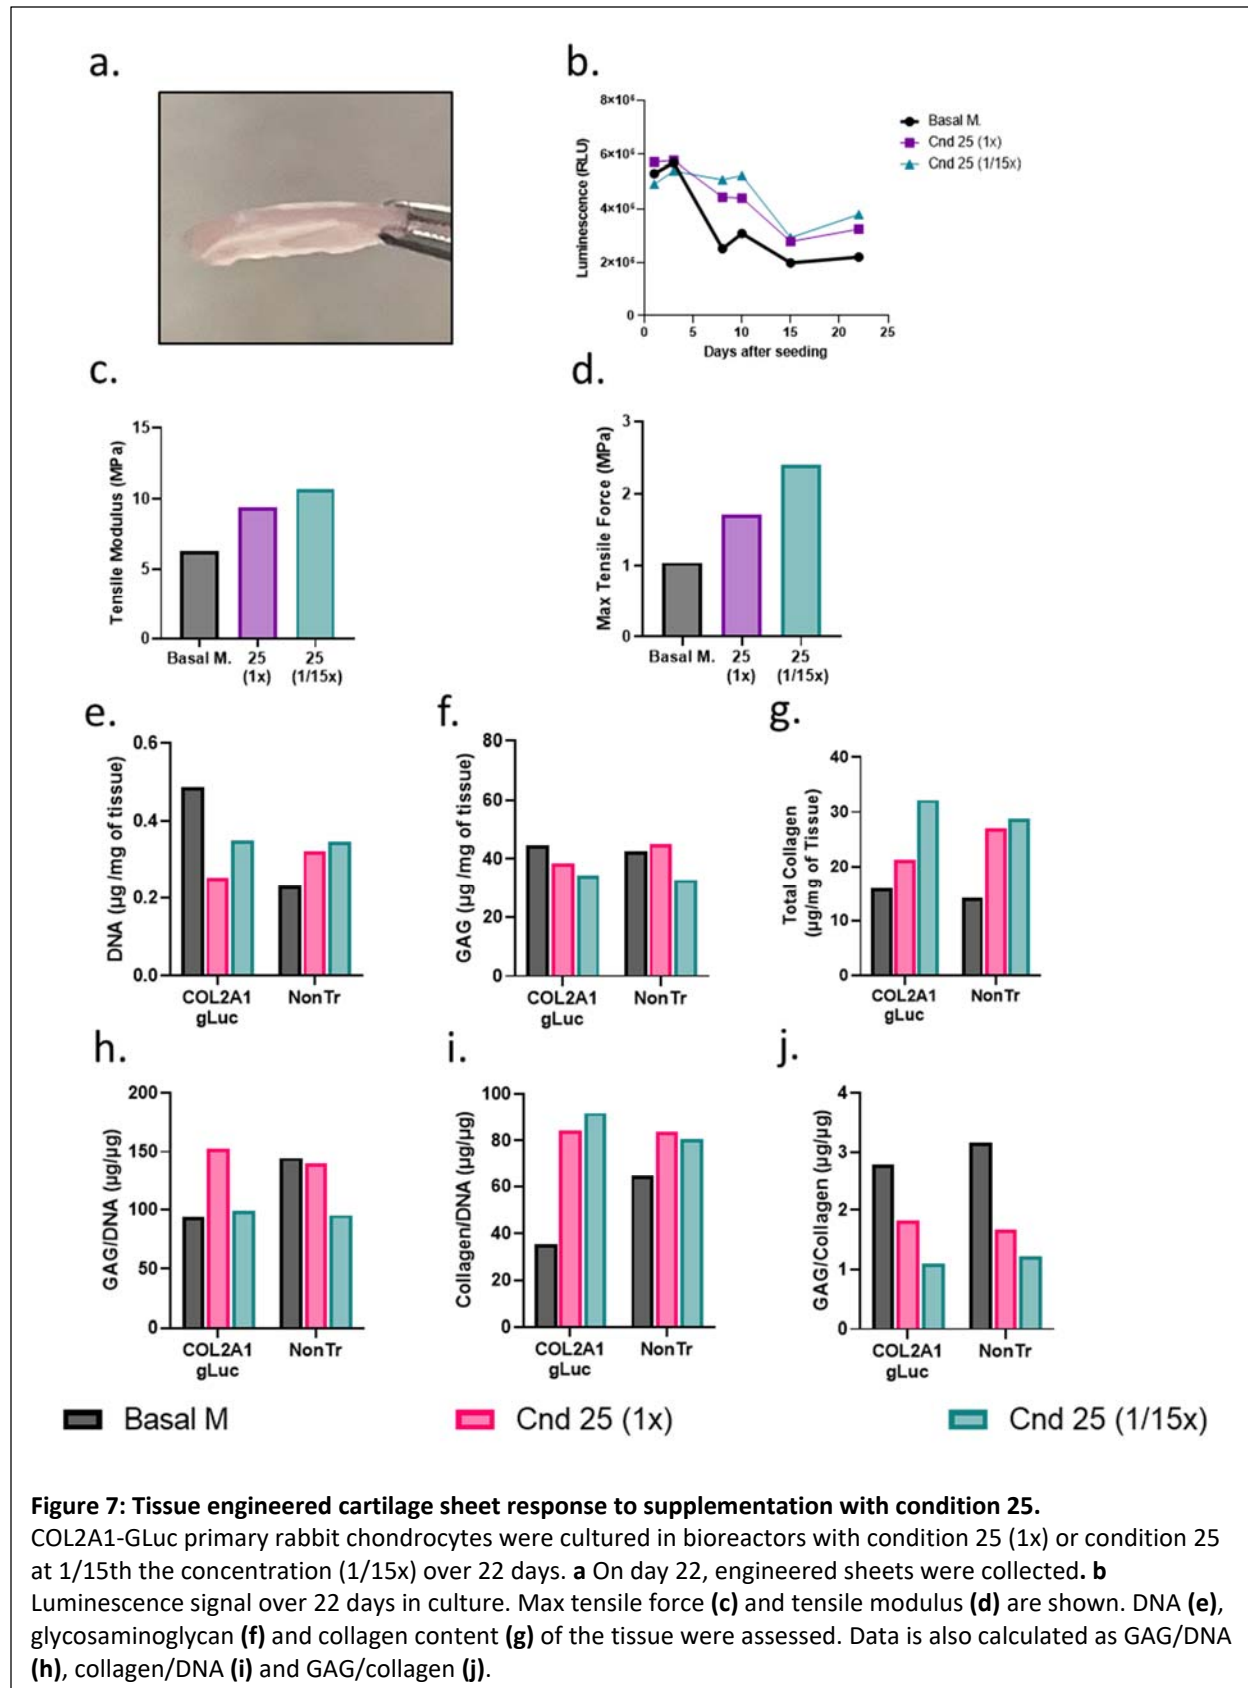



220 Similar to results seen when conditions were tested in aggregates (**Fig. 3**), both condition 25 at  
221 1x and at 1/15<sup>th</sup> concentration showed increased luminescence as compared to basal media  
222 after day 8. A different curve in luminescence is observed in **Fig. 7b** as compared to **Fig. 3a**  
223 because samples were collected from inside of the biochamber for day 1 and day 3. After day 3,  
224 medium was added to increase exchange between the inside and outside of the chamber, thus  
225 samples collected are from a larger volume resulting in a decrease in luminescence from day 3  
226 to day 8. After sheets were collected, several biopsy punches of the sheets were obtained for  
227 endpoint analysis. To determine whether increased COL2A1 reporter activity translates to  
228 improved mechanical properties of engineered cartilage, we assessed tissue elasticity via  
229 tensile testing. As expected, we observed a marked increase in the Tensile modulus (**Fig. 7c**) as  
230 well as maximal tensile force (**Fig. 7d**), in sheets generated in condition 25 media at 1x and  
231 1/15<sup>th</sup> of the concentration as compared to basal media, from ~6 MPa in basal media to ~8 MPa  
232 in condition 25 and ~10 MPa in condition 25 at 1/15<sup>th</sup> concentration. In contrast, compression  
233 testing resulted in a marked decrease in stiffness for sheets generated in conditions 25  
234 regardless of concentration (**Supplementary Fig. 2**).

235 To evaluate whether the luminescence results reflected matrix accumulation,  
236 biochemical assays were performed at day 22 of the experiment to quantitate DNA,  
237 glycosaminoglycan (GAG) and total collagen content from bioreactors seeded with COL2A1-  
238 Gluc and non-transduced cells. Both COL2A1-gLuc and non-transduced cell generated sheets  
239 had similar trends in DNA (**Fig. 7e**), GAG (**Fig. 7f**), and total collagen (**Fig. 7g**) except for the  
240 sheet generated with COL2A1-Gluc cells in condition 25 at (1x), which shows substantially lower  
241 collagen as compared to its non-transduced counterpart (**Fig. 7g**). Sheets in supplemented



242 groups had overall higher collagen content per milligram of tissue, as well as per microgram of  
243 DNA (**Fig. 7g** and **7i**). Total glycosaminoglycan content is relatively constant for all groups at ~40  
244  $\mu\text{g}$  per mg of wet tissue weight (**Fig. 7f**), when normalized to collagen content (**Fig. 7j**) there is a  
245 noticeable decrease in sheets generated in condition 25 (both 1x and 1/15x) suggesting that  
246 condition 25 specifically affects collagen content and not glycosaminoglycan content.

247 Immunofluorescence of sections of the engineered cartilage confirmed the presence of type II  
248 collagen (**Fig 8a**). Interestingly, condition 25 (1/15<sup>th</sup>) had a more extensive distribution of type II  
249 collagen signal as compared to basal media alone which showed an uneven pattern of staining.

250 Collagen heteropolymer analysis was also carried out on samples of the engineered cartilage  
251 sheets and compared to native rabbit articular cartilage to further analyze collagen content.

252 **Figure 8b** shows that the major pepsin-resistant Coomassie blue-stained band in both  
253 transfected and non-transfected articular chondrocyte cultures migrated identically to the  
254  $\alpha 1(\text{II})$  chain of type II collagen in the adult rabbit articular cartilage.  $\beta 1(\text{II})$  chains (dimers of  
255  $\alpha 1(\text{II})$  chains) were also observed in all lanes (**Fig. 8b**). Two faintly stained bands migrating  
256 slightly slower than that of the  $\alpha 1(\text{II})$  chains, are the  $\alpha 1(\text{XI})$  and  $\alpha 2(\text{XI})$  chains of type XI collagen  
257 as previously identified by mass spectrometry and described by McAlinden et al.<sup>23,24</sup>. The  $\alpha 1(\text{I})$   
258 and  $\alpha 2(\text{I})$  chains of type I collagen were neither detected in engineered cartilages nor in the  
259 control articular cartilage (if present the  $\alpha 2(\text{I})$  chain migrates slightly faster than the  $\alpha 1(\text{II})$   
260 chain), indicating that type II collagen and type XI collagen were the major collagens  
261 synthesized by the cultured chondrocytes and the cartilage collagen phenotype was maintained  
262 (**Fig. 8b**). The western blot shown in **Fig. 8c** confirms that the Coomassie blue stained bands  
263 were indeed  $\alpha 1(\text{II})$  chains of type II collagen.

264

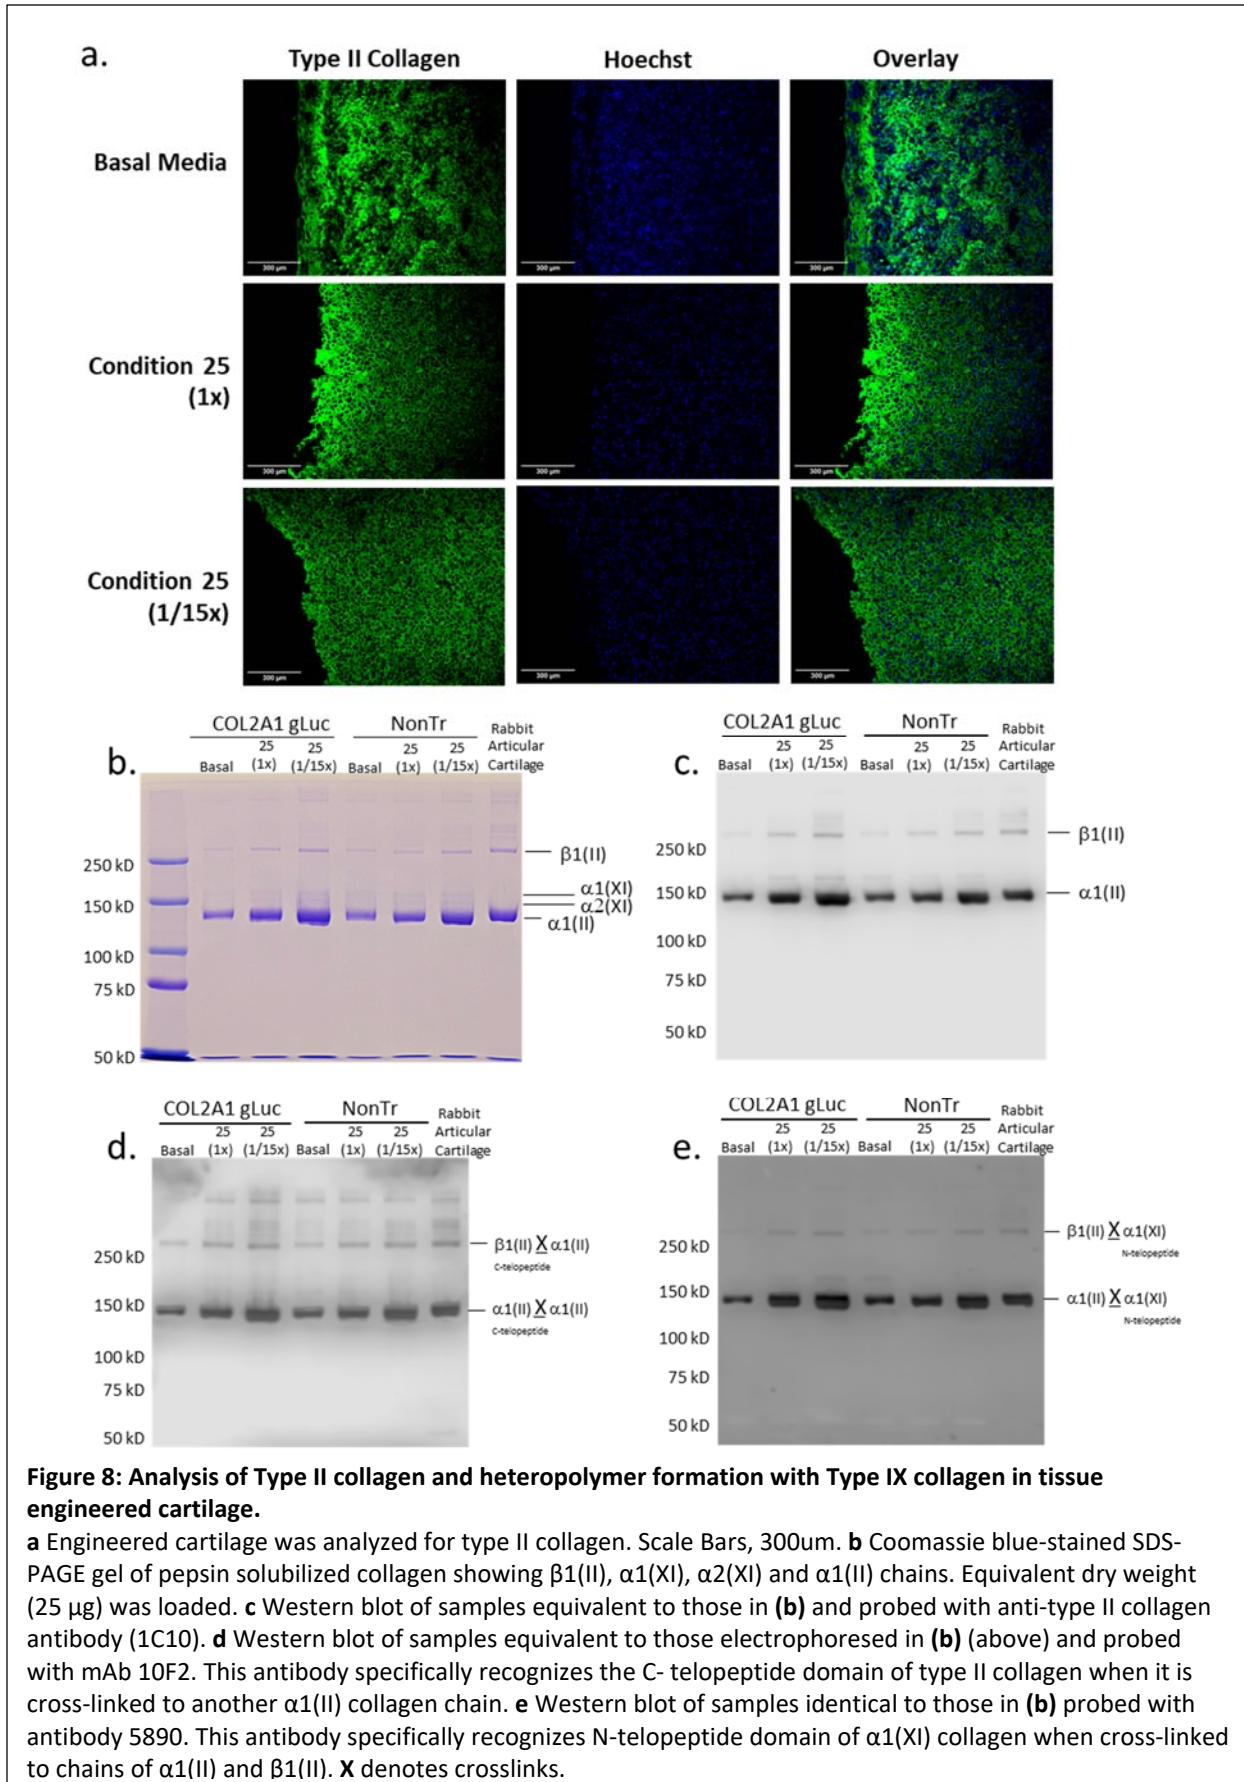

265 Using mAb 1C10, which specifically recognizes type II collagen chains<sup>25</sup>, intense staining of both  
266 the  $\alpha 1(\text{II})$  and  $\beta 1(\text{II})$  chains were observed in all the cultures and the adult rabbit cartilage. Since  
267 equivalent engineered cartilage dry weights loads were electrophoresed in all the lanes,  
268 densitometry of the Western blot revealed increased levels of type II collagen ( $\alpha 1(\text{II}) + \beta 1(\text{II})$ )  
269 reactivity under condition 25 in both transfected and non-transfected cultures compared to  
270 basal conditions. Condition 25 (1/15x) however showed highest levels of reactivity indicating  
271 highest type II collagen retained in the Condition 25 (1/15x) sheet. This is consistent with the  
272 analytical results in **Fig. 7g** showing highest collagen content under this condition on a per mass  
273 basis. Using a refined Western blot method<sup>21</sup> we were able to identify precise domains of  
274 collagen chains that were cross-linked in these cultures. As seen in **Fig. 8d**, western blotting  
275 using mAb 10F2<sup>24,26</sup> recognized the  $\alpha 1(\text{II})$  and  $\beta 1(\text{II})$  chains in all the cultures and the adult  
276 rabbit cartilage. This is evidence that the C-telopeptide of the  $\alpha 1(\text{II})$  chain specifically  
277 recognized by this antibody was cross-linked to the helical lysine (K87) residues in a fraction of  
278  $\alpha 1(\text{II})$  collagen chains and, thus, type II to type II collagen cross-links had formed in these  
279 cultures<sup>21</sup>. It must be reiterated that pepsin-extracted  $\alpha 1(\text{II})$  collagen chains are devoid of  
280 telopeptides unless they are cross-linked to the lysine residues in the helical regions of  $\alpha 1(\text{II})$   
281 chains<sup>21,24</sup>.

282 To examine if type II and type XI collagen molecules in these cultures were stabilized by these  
283 cross-links, we used the pAb 5890<sup>23,24</sup>. As seen in **Fig. 8e**, this antibody also recognized the  
284  $\alpha 1(\text{II})$  chains and the  $\beta 1(\text{II})$  chains of type II collagen in the tissue engineered sheets and adult  
285 rabbit cartilage. As shown before<sup>24</sup>, this means that the N-telopeptide of the  $\alpha 1(\text{XI})$  chain to  
286 which this antibody was raised was cross-linked to the helical lysine (K930) residue in a fraction

287 of  $\alpha 1(\text{II})$  chains of type II collagen molecules and thus a hetero-polymer of type II and type XI  
288 collagens had formed in all these cultures. A faint reactivity of the  $\alpha 1(\text{XI})$  chain was observed in  
289 some of the engineered cartilage cultures that probably indicates that N-telopeptides of  $\alpha 1(\text{XI})$   
290 chain are cross-linked to helical lysine of another  $\alpha 1(\text{XI})$  chain and a homo-polymer in a fraction  
291 of type XI collagen had also formed in these cultures. The data confirms that a polymer of type  
292 II collagen had formed in tissue engineered cartilage sheets and a mature collagenous  
293 heteropolymer of cross-linked type II-XI collagen fibrils had formed.

## 294 **DISCUSSION**

295 Our previous efforts to optimize media conditions tested the effect of 15 different  
296 micronutrients and thyroxine on murine chondrocytes using proposed concentrations based on  
297 physiologic levels in a one-factor at a time approach<sup>6</sup>. In that work, we identified copper,  
298 vitamin A and linolenic acid as having a positive effect on chondrogenesis. Overall, we found  
299 that combinations of these micronutrients were able to increase the expression of type II  
300 collagen when tested temporally and in a dose-dependent manner<sup>6</sup>. While we showed that  
301 vitamins and minerals affect type II collagen production in murine chondrocytes *in vitro*, we  
302 noted several limitations of using a traditional one factor at a time approach. This approach  
303 consists of experimental runs that are executed to hold every factor constant except for the  
304 variable of interest. This approach poorly reflects the complexity of *in vivo* conditions by failing  
305 to account for important interactions and largely relies on iterative experiments and trial and  
306 error for optimization. In the current study, we combined a non-destructive reporter, primary  
307 rabbit chondrocytes, 3D culture in 96-well plates, automated pipetting, and Design of  
308 Experiments approach as an efficient high throughput platform. We were able to not only

309 identify interactions of micronutrients that had an effect on type II collagen expression, but to  
310 also derive an optimal combination containing all missing factors as a supplement to traditional  
311 basal media, that simultaneously increased type II collagen expression.

312         There are several advantages to the platform we implemented in this study. 1) we made  
313 use of primary rabbit articular chondrocytes as a model for healthy cartilage. Primary cells have  
314 the advantage of being more relevant in orthopedic research than cell lines and thus more  
315 likely to mimic responses *in vivo*<sup>27-30</sup>. 2) using 3D cell aggregates adapted to 96-well plates  
316 cultured in physiologic conditions, which we adapted for use in an automated system, allows  
317 chondrocytes to maintain their phenotype as compared to 2D culture<sup>31-35</sup>. 3) We made use of a  
318 secreted *Gaussia* Luciferase reporter<sup>36-40</sup>. Traditional biochemical assays to evaluate  
319 chondrogenesis typically rely on destructive endpoint analysis, and due to the length of culture  
320 of the samples, low cell number in aggregates, and long and laborious processes, can result in  
321 high variability as seen in **Fig. 3e-j**. Using a secreted reporter allows us to sample the media  
322 without lysis of the aggregate and thus provides the ability to examine the temporal effects of  
323 the treatment conditions on chondrogenesis. Because media is replaced every 2-3 days *Gaussia*  
324 luciferase readings provide a readout of the activity of the type II collagen promoter at early,  
325 mid and late timepoints in chondrogenesis. This was seen and confirmed by the TGF- $\beta$ 1 dose  
326 response curve where we have shown, for the first time, that the effective dose of TGF- $\beta$ 1 on  
327 type II collagen stimulation differs throughout the process of chondrogenesis. Furthermore,  
328 type II collagen expression levels are 66% higher at early timepoints with a decrease in activity  
329 at later timepoints of chondrogenesis (**Fig. 1a** and **1b**). The *Gaussia* luciferase assay is simple,  
330 sensitive and fast to perform and thus reduces variability between samples.

331 Using this platform, we successfully screened 240 combinations of vitamins and  
332 minerals for their ability to promote type II collagen. Previous studies have shown that several  
333 of the micronutrients we tested can play a role in chondrogenesis<sup>6,8,13,41-44</sup>. Previously, vitamins  
334 D and K were shown to play a role in the development and regulation of chondrogenesis, while  
335 vitamin A exhibited inhibitory action on *in vitro* chondrogenic differentiation<sup>12,42</sup>. Additionally,  
336 vitamin E has exhibited oxidative stress inhibition during *in vivo* and clinical studies<sup>13</sup>. Other  
337 trace minerals such as copper and zinc promote extracellular matrix formation and deficiencies  
338 in selenium and iodine have been shown to impair bone and growth formation<sup>44</sup>. Molecules like  
339 linoleic acid are known to enhance the metabolic activity of differentiating cells, while thyroxine  
340 was shown to increase type II collagen expression and glycosaminoglycan (GAG) deposition in  
341 scaffold-free engineered cartilage tissue<sup>8,12</sup>. In this study we identified linolenic acid, copper,  
342 and vitamin A, as well as interactions between various vitamins and minerals (**Table 2**) as  
343 having significant effects on type II collagen stimulation.

344 These findings relied on the use of Response Surface Methodology based on Design of  
345 Experiments which significantly reduces the number of trials, accounts for errors in the model,  
346 and for interactions between factors<sup>45-48</sup>. Statistical analysis with this approach allowed us to  
347 predict an optimal combination of vitamins and minerals, condition 25, that when tested *in*  
348 *vitro* showed significant increases in type II collagen as compared to the basal media control.  
349 Furthermore, we removed one factor at a time from condition 25 and confirmed the  
350 importance of linolenic acid, vitamin A and vitamin D and their interactions in type II collagen  
351 stimulation, further confirming the validity of the DoE results.

352 While Response Surface Methodology has significant advantages, its effectiveness does  
353 rely on the data fitting a second order polynomial model, thus fit statistics are crucial to ensure  
354 that the data fits the model<sup>47,49</sup>. In addition, the validation of any findings is essential. Other  
355 aspects to consider include parameter selection for optimization of factors and response, as  
356 well as examining predicted values before validation. In our study, this is seen by our predicted  
357 condition 25, while having a predicted desirability of 0.595, it was selected for validation due to  
358 the high predicted individual responses during analysis. When tested *in vitro*, it showed similar  
359 if not better responses than other selected conditions. There are few studies that have used  
360 Design of Experiments to look at biological processes, typically investigating fewer factors<sup>17,18,50</sup>.  
361 To date, this study is the first to apply a response surface model to primary chondrocytes.

362 After validation of condition 25 in aggregates we explored this supplementation in  
363 tissue engineered cartilage. We used custom 3D printed bioreactors adapted from Whitney, GA  
364 et al. to generate cartilage sheets *in vitro* (**Fig. 6** and **Fig. 7a**)<sup>21,22,51</sup>. Similar to our findings in cell  
365 aggregates, type II collagen promoter-driven expression of *Gaussia* Luciferase was significantly  
366 increased as compared to cells in basal media in engineered cartilage. Biochemical studies  
367 supported an increase in total collagen content. Western blots of pepsin extracted samples  
368 confirm the increase is type II collagen, specifically, in sheets supplemented with condition 25  
369 (**Fig 8c**). Collagen x-link analysis supports the formation of type II collagen to type II collagen  
370 and type II collagen to type IX collagen heteropolymers, as in native rabbit cartilage (**Fig 8d** and  
371 **Fig 8e**). These crosslinks are characteristic of mature cartilage. This is significant as cell  
372 processes, particularly in tissue engineering, are often context dependent<sup>52-54</sup>. It is interesting  
373 to note that condition 25 at 1/15<sup>th</sup> was optimal for type II collagen expression as compared to



374 condition 25 at 1x, as seen by luminescence, immunofluorescence and western blot. It is  
375 possible that higher concentrations are not needed by chondrocytes and could even be  
376 detrimental for chondrogenesis resulting in greater type II collagen expression when the  
377 concentrations are decreased. Multiple cell types, like osteoblasts, endothelial cells and  
378 vascular smooth muscle cells, have specialized mechanisms to recycle and fully utilize vitamins  
379 and minerals, as these cannot be synthesized by humans<sup>55-58</sup>. Investigation of micronutrient  
380 recycling in chondrocytes has not been well studied and was beyond the scope of this work.

381           Supplementation with condition 25 also altered the mechanical properties of the  
382 engineered cartilage. While it increased the tensile modulus of engineered cartilage,  
383 unexpectedly, we observed a decrease in Young's modulus in compressive tests as compared to  
384 basal media (**Supplementary Fig. 2**), suggestive of decreased stiffness. While it is thought that  
385 type II collagen generally increases the tensile properties of cartilage, there is no clear  
386 correlation between type II collagen and stiffness<sup>59</sup>. Furthermore, mechanical testing of live  
387 biological tissue is also confounded by the method of testing. Patel JM et al.<sup>60</sup>, has explored the  
388 inconsistencies present with various modes of mechanical testing which make any comparison  
389 of our findings to previous literature extremely difficult. Despite a decrease in the compressive  
390 modulus the engineered cartilage generated with condition 25 shows mechanical and  
391 biochemical properties closer to that of native cartilage than engineered cartilage generated in  
392 basal media alone.

## 393 **CONCLUSIONS**

394           This study demonstrates that the physiologic environment of micronutrients to culture  
395 chondrocytes has a far greater impact on chondrogenesis than previously appreciated.



396 Supplementation of culture medium with 15 micronutrients, that are physiologically present in  
397 the articular joint, can be tailored to improve *in vitro* chondrogenesis, and the biochemical and  
398 mechanical properties of tissue engineered cartilage. Our results show that the presence and  
399 concentrations of seemingly minor components of culture medium can have a major impact on  
400 chondrogenesis. Furthermore, we established a streamlined process using Design of  
401 Experiments and primary reporter chondrocytes as a way to identify optimal chondrogenic  
402 conditions *in vitro*.

## 403 **METHODS**

### 404 **Rabbit Primary Chondrocyte Isolation**

405 Rabbits were euthanized under American Veterinary Medical Association guidelines and knees  
406 were isolated within 2 hours of euthanasia. The articular knee joints were dissected under  
407 sterile conditions, and articular cartilage was isolated from both the femoral condyle and the  
408 tibial plateau. Isolated cartilage was diced into  $<1\text{mm}^3$  pieces before sequential digest, first in  
409 hyaluronidase for 30 min (660 Units/ml Sigma, H3506; in DMEM/F12 with  
410 pen/strep/amphotericin B, 30ml), followed by collagenase type II for ~16 hours at 37°C (583  
411 Units/ml Worthington Biochemical Corp.; in DMEM/F12 with 10% FBS, 1% pen/strep/fungizone,  
412 30ml). The digest was then filtered through a 70  $\mu\text{m}$  cell strainer, washed with DMEM/F12, and  
413 resuspended in growth media (DMEM/F12 supplemented with 10% FBS, 1% pen/strep). Cells  
414 were subsequently infected as described below or cryopreserved (95% FBS, 5% DMSO).

### 415 **Lentiviral Construct**

416 Lentivirus was generated as previously described<sup>6</sup>. Briefly, an HIV based lentiviral third  
417 generation system from GeneCopoeia was used to generate pseudolentiviral particles. Custom

418 ordered COL2A1-*Gaussia* Luciferase plasmid (HPRM22364-LvPG02, GeneCopoeia, Inc.),  
419 envelope (pMD2.G) and packaging (psPAX2) plasmids were amplified in *Escherichia coli* (GCI-L3,  
420 GeneCopoeia) and silica column purified (Qiagen Maxiprep) before being co-transfected into  
421 HEK293Ta (GeneCopoeia) cells via calcium chloride precipitation. Pseudolentiviral particles  
422 were harvested from conditioned media after 48h and concentrated via ultracentrifugation  
423 (10,000 RCF, 4°C, overnight). Titers for COL2A1-Gluc lentivirus were estimated via real-time PCR  
424 and aliquots stored at -80°C.

#### 425 **Lentivirus Infection of Primary Rabbit Chondrocytes**

426 Isolated rabbit chondrocytes were seeded at 6,200 cells/cm<sup>2</sup> in growth media and allowed to  
427 adhere overnight (~20% confluency). Cells were infected with lentivirus (COL2A1-GLuc; MOI 25  
428 in growth media) in the presence of 4µg/ml polybrene (Opti-mem, Gibco) for 12h. Lentiviral  
429 medium was replaced with growth medium and cells expanded to ~90% confluency. Cells were  
430 subsequently plated on flasks coated in porcine synoviocyte matrix<sup>5,61</sup> and selected with  
431 puromycin (2 µg/ml) when 70% confluent for 48 hours. Culturing of rabbit chondrocytes during  
432 infection was done in physioxia (37°C, 5% O<sub>2</sub>, 5% CO<sub>2</sub>) conditions. Newly generated COL2A1-  
433 GLuc cells were cryopreserved at the end of this first passage (95% FBS, 5% DMSO). These cells  
434 were used for all subsequent studies.

#### 435 **Chondrogenic Culture**

436 Rabbit COL2A1-GLuc were thawed and seeded in growth media at 6000 cells/cm<sup>2</sup> and expanded  
437 to 90-100% confluence in physioxia. Cells were trypsinized (0.25% Trypsin/EDTA; Corning),  
438 resuspended in basal chondrogenic media (93.24% High-Glucose DMEM (Gibco), 1%  
439 dexamethasone 10<sup>-5</sup>M (Sigma), 1% ITS+premix (Becton-Dickinson), 1% Glutamax (Hyclone), 1%

440 100 mM Sodium Pyruvate (Hyclone), 1% MEM Non-Essential Amino Acids (Hyclone), 0.26% L-  
441 Ascorbic Acid Phosphate 50mM (Wako), 0.5% Fungizone (Life Technologies) with TGF- $\beta$ 1  
442 (Peprotech) and seeded as described below.

### 443 **Generation and Maintenance of 3D Aggregates**

444 To generate 3D aggregates, cells were seeded at 50,000 cells per well (in 96-well cell repellent  
445 u-bottom plates, GreinerBio) and then centrifuged at 500 RCF, 5 min. For the TGF- $\beta$ 1 dose  
446 response studies, that serve as positive controls for the reporter cells, aggregates were cultured  
447 in basal chondrogenic media and different concentrations of TGF- $\beta$ 1 ranging from 0-10 ng/ml.  
448 For the DoE studies, aggregates were cultured in basal chondrogenic media (1ng/ml TGF- $\beta$ 1) as  
449 a control or basal media supplemented with vitamins and minerals (**Table 1** and **Supplemental**  
450 **Table 1,2**). Plates were cultured for three weeks in physioxia, media was sampled and replaced  
451 three times a week with respective medium. An OT-2 (Opentrons) python coded robotic  
452 pipette, programmed at an aspiration height of 2mm from the bottom of the wells and  
453 aspiration rate of 40 $\mu$ l/s was utilized for media preparation, cell feeding, and media sampling  
454 for luciferase assay (**Supplementary File 1**). After three weeks, cell aggregates were either fixed  
455 in neutral buffered formalin for histology or medium removed and aggregates frozen dry  
456 (-20°C) for biochemical assays.

### 457 **Tissue Engineered Cartilage Sheets**

#### 458 **A) Biochamber Sterilization and Assembly**

459 Custom 3D printed biochambers<sup>51</sup> that produce 1.2 cm<sup>2</sup> cartilage sheets are shown in **Fig. 6**.  
460 The chambers are made of an acrylonitrile butadiene styrene (ABS) seeding chamber and a 10  
461  $\mu$ m pore polyester membrane (Sterlitech). Screws, a silicone washer and ABS frits hold

462 everything securely and prevent any leaking in between the different pieces. Furthermore, they  
463 keep the chamber elevated to allow medium to reach the membrane from the top and bottom  
464 for efficient media exchange. The chambers are contained within Nalgene containers modified  
465 to have a 0.2  $\mu\text{m}$  sterile filter on the top to allow gas exchange.

466 The Nalgene containers along with screws, silicone washer, polyester membrane and nuts were  
467 autoclaved and sterile filters fitted to the containers in a biosafety cabinet. ABS pieces were  
468 placed in a sealable container for sterilization by immersion in a 10% bleach solution, water  
469 rinse, followed by a 10% sodium thiosulfate treatment to neutralize any remaining chlorine,  
470 sterile water and isopropanol wash before drying in the biosafety cabinet. Biochambers were  
471 assembled as shown in **Fig. 6a** inside a biosafety hood using sterile surgical gloves and  
472 autoclaved surgical tools to handle biochamber parts. Once assembled, the polyester  
473 membrane was coated with fibronectin ( $50\mu\text{g}/\text{cm}^2$ , Corning, in PBS) and allowed to dry in a  
474 biosafety cabinet for 1hr.

#### 475 **B) Generation and Culture of Tissue Engineered Cartilage Sheets**

476 COL2A1-Gluc cells or uninfected primary rabbit chondrocytes were seeded at  $5 \times 10^6$  cells/ $\text{cm}^2$   
477 in ABS biochambers with a  $1.2 \text{ cm}^2$  seeding area in basal chondrogenic media alone or in basal  
478 media with condition 25 at 1x and 1/15x (**Supplementary Table 2**)<sup>51</sup>. Media were added in the  
479 Nalgene container outside of the biochamber making sure it did not reach the top of the  
480 biochamber and combine with the cell suspension inside the biochamber in order to allow cells  
481 to adhere to the membrane. After 1 day, medium was added to the top of the biochamber so  
482 that media exchange occurs with the inside of the whole biochamber. These were cultured in  
483 physioxia on a shaker (10 RPM) for 3-weeks with media changes three times a week. During

484 media replacement, samples from COL2A1-Gluc biochambers were assessed for luciferase.  
485 After three weeks, cartilage sheets were collected, four (4 mm) biopsy punches were taken for  
486 mechanical assessment, and collagen cross-linking analysis, remaining pieces of the sheets were  
487 frozen (-80°C) for biochemical assessment or stored in formalin for histology.

#### 488 **Luciferase Assay**

489 Cell culture medium sampled from the seeded 96-wells (20µL/well) was assessed using a  
490 stabilized *Gaussia* Luciferase buffer at a final concentration of 0.09 M MES, 0.15M Ascorbic  
491 Acid, and 4.2µM Coelenterazine in white 96-well plates. Luminescence was measured in a plate  
492 reader (25°C, relative light units, EnVision plate reader). An OT-2 (Opentrons) python coded  
493 robotic pipette was utilized for luciferase buffer addition to white plates (GreinerBio).

#### 494 **Immunohistochemistry/ Immunofluorescence**

495 At the end of three-week culture, cell aggregates were fixed in 10% Neutral Buffered Formalin  
496 overnight, embedded in paraffin wax and sectioned (7µm sections). Sections were  
497 deparaffinized and hydrated, followed by treatment with pronase (1mg/ml, Sigma P5147, in  
498 PBS with 5mM CaCl<sub>2</sub>) for epitope retrieval and incubation with primary anti-Collagen Type II  
499 (DSHB II-II6B3) followed by a biotinylated secondary and Streptavidin-HRP (BD Biosciences). II-  
500 II6B3 was deposited to the DSHB by Linsenmayer, T.F. (DSHB Hybridoma Product II-II6B3).  
501 Sections were stained with a chromogen-based substrate kit (Vector labs, VIP substrate vector  
502 kit). Engineered cartilage sheet sections were also treated with pronase and primary anti-  
503 Collagen Type II (DSHB II-II6B3) followed by VectaFluor R.T.U Antibody Kit DyLight® 488 (Vector  
504 Labs DI-2788) following manufacturer's protocol. All sections were imaged at 10x magnification.

505

## 506 **Biochemical Assays**

507 Frozen cell aggregates, or pieces of engineered cartilage were thawed in PBS, and enzymatically  
508 digested with Papain (25 µg/ml, Sigma, P4762, in 2mM cysteine; 50mM sodium phosphate;  
509 2mM EDTA at a pH 6.5, 100 µl) at 65°C overnight. During digestion, plates were covered with a  
510 qPCR adhesive sealing film (USA Scientific), a silicone sheet, and steel plates clamped to the  
511 plate to prevent evaporation. After digestion half of the digest was transferred to another plate  
512 and frozen for hydroxyproline assessment. For the remaining half of the digest, papain was  
513 inactivated with 0.1M NaOH (50 µl) followed by neutralization (100mM Na<sub>2</sub>HPO<sub>4</sub>, 0.1 N HCL,  
514 pH 1.82, 50 µl). To assess DNA, samples of the digests (20 µl) were combined with buffered  
515 Hoechst dye (#33258, 667ng/ml, phosphate buffer pH 8, 100 µl) and fluorescence measured at  
516 an excitation of 365nm and emission of 460nm. For GAG assessment, samples of aggregate  
517 digest (5µl) were combined with a 1,9-Dimethyl-methylene blue solution (195µl) and  
518 absorbance was measured at 595nm and 525nm<sup>62</sup>. Absorbance readings were corrected by  
519 subtracting 595nm reading from 525nm. Total micrograms of DNA and GAG were calculated  
520 using a Calf thymus DNA standard (Sigma) and Chondroitin Sulfate standard (Seikagaku Corp.),  
521 respectively.

522 For hydroxyproline (HP), the frozen digest was thawed and incubated overnight at 105°C with  
523 6M HCL (200µl). Plates were covered as described above to prevent evaporation. Samples were  
524 subsequently dried at 70°C overnight with a hydroxyproline standard (Sigma). Copper sulfate  
525 (0.15M, 10µl) and sodium hydroxide (2.5M, 10µl) were added to each well and incubated at  
526 50°C for 5 minutes, followed by hydrogen peroxide (6%, 10 µl) for 10minutes. Sulfuric acid (1.5  
527 M, 40µl) and Ehrlich's reagent<sup>21</sup> (20µl) were added and samples further incubated at 70°C for

528 15 minutes before reading absorbance at 505nm. Total micrograms of hydroxyproline were  
529 calculated using the standard. Total collagen was calculated by the following formula<sup>21</sup> ( $\mu\text{g}$  of  
530  $\text{HP} \times 7.6 = \mu\text{g Total Collagen}$ ).<sup>21</sup>

### 531 **Collagen Cross-Link Analysis**

532 After harvest, samples were frozen at  $-80^{\circ}\text{C}$  until use. Samples were lyophilized, and dry  
533 weights obtained. Proteoglycans were extracted using 4M guanidine hydrochloride (GuHCl) in  
534 50mM Tris buffer pH 7.4. The residue was exhaustively rinsed using MilliQ water to remove  
535 residual GuHCl, lyophilized and weighed. The cross-linked collagen network was depolymerized  
536 using equal volumes of pepsin (0.5mg/mL in 0.5M acetic acid)<sup>26</sup>. Equivalent aliquots of dry  
537 weights were loaded on 6% polyacrylamide gels. Pepsin-extracted type II collagen from adult  
538 rabbit articular cartilage was used as a control. After electrophoresis, collagen chains were  
539 stained using Coomassie Blue. For Western blots, following SDS-PAGE the separated collagen  
540 chains were transferred, by electrophoresis, onto a polyvinyl difluoride (PVDF) membrane and  
541 probed with monoclonal antibody (mAb) 10F2 to identify the C-telopeptide of  $\alpha 1(\text{II})$  collagen  
542 chains cross-linked to  $\alpha 1(\text{II})$  chains. Another blot was probed with polyclonal antibody (pAb)  
543 5890 to identify the N-telopeptide of  $\alpha 1(\text{XI})$  chains cross-linked to  $\alpha 1(\text{II})$  chains. This blot was  
544 then stripped and probed with mAb 1C10 to identify  $\alpha 1(\text{II})$  chains. As we have described before,  
545 this determines if a heteropolymer of type II and type XI collagen had formed<sup>26</sup>.

### 546 **Mechanical Testing**

#### 547 **A) Compression Testing**

548 Biopsy punches (4mm) were thawed in Tyrode's solution (Sigma) with protease inhibitors  
549 (Sigma, P8465) and equilibrated to room temperature. Using a TA.XTPlus connect Texture

550 analyzer a trigger force of 0.1 gram determined the height of the tissue, then 5-20% strain was  
551 applied in 5% increments with a 20-minute hold to reach equilibrium. From these results, the  
552 equilibrium force was calculated, and a stress vs strain curve generated<sup>21</sup>. Young's modulus in  
553 compression was determined from the slope of these curves.

## 554 **B) Tensile Testing**

555 Biopsy punches (4mm) were thawed in Tyrode's solution (Sigma) with protease inhibitors and  
556 equilibrated to room temperature. As previously described, a custom dog-bone punch was  
557 made from biopsy punches and punches taken from the 4 mm punch<sup>21</sup>. Custom holders were  
558 made from laminate projector sheets and dog-bone punches attached using cyanoacrylate glue  
559 (Ultra Gel Control, Loctite), tissue was continuously bathed in PBS during this process<sup>21</sup>. Using a  
560 TA.XTPlus connect Texture analyzer with a trigger force of 0.1 gram, tissues were stretched to  
561 failure, the equilibrium tensile force was calculated and a stress vs strain curve generated<sup>21</sup>.  
562 Young's modulus in tension was determined from the slope of these curves.

## 563 **Design of Experiment Response Surface Design**

564 Design-Expert 12 (StatEase) was used to generate a surface response model to assess the effect  
565 of 15 factors: linoleic acid, cobalt, copper, chromium, iodine, manganese, molybdenum,  
566 thyroxine, vitamin A, vitamin B12, vitamin B7, vitamin D, vitamin E, vitamin K, and zinc. **Table 1**  
567 shows minimum and maximum concentrations input into Design-Expert. The response surface  
568 I-optimal blocked design generated 240 total conditions to assess the response (**Supplemental**  
569 **Table 1**).

570

571



## 572 **Design of Experiments Analysis**

573 At the end of this experiment, responses (luminescence, metabolic activity and aggregate area)  
574 from the screen of 240 conditions as well as results from the one factor at a time approach,  
575 were analyzed (Design-Expert, StatEase). Analysis of the results suggested a quadratic model as  
576 the best fit. After transformation of the data to fit a quadratic model, Analysis of Variance  
577 (ANOVA) was used to identify the positive and negative effects on chondrogenesis as well as fit  
578 statistics for the model. The optimization module of the software was used to generate five  
579 predicted optimal combinations of factors (**Supplemental Table 2**). Two sets of parameters  
580 were used to generate predicted conditions. For condition 25 from **Supplemental Table 2**, all  
581 vitamins and minerals were targeted at 75% serum max except for linolenic acid, vitamin A,  
582 copper and vitamin D which are set at their predicted optima. For the other predicted  
583 conditions vitamins and minerals were set between 0.01% of serum max and serum max except  
584 for vitamin A, E and linolenic acid which were at their approximate optima. All conditions were  
585 selected to maximize luminescence for week two and week three as well as aggregate area for  
586 week three. Condition 25 also had a target of 0.2, for Resazurin (metabolic activity), the  
587 average measurement for chondrocyte aggregates, at week three.

## 588 **Statistical Analysis**

589 Statistical analysis for all experiments except for the Design of Experiments screen (analysis  
590 described above) were performed using GraphPad Prism 9 and One-way or two-way ANOVA. All  
591 data passed tests for normality. In all figures \* indicates p-value < 0.05, \*\* indicates p- value  
592 <0.01, and \*\*\* indicates p- value < 0.001.

593

594 **ACKNOWLEDGEMENTS**

595 We would like to thank Dr. Steven Mills (University of Texas Health Sciences) for the donation  
596 of rabbit tissue. The plasmids, pMD2.G, and psPAX2, were a gift from Didier Trono (Addgene  
597 plasmid # 12259; <http://n2t.net/addgene:12259>; [RRID:Addgene\\_12259](https://doi.org/10.12555/RRID:Addgene_12259)) and (Addgene plasmid #  
598 12260; <http://n2t.net/addgene:12260>; [RRID:Addgene\\_12260](https://doi.org/10.12555/RRID:Addgene_12260)) respectively. Funding was supplied by  
599 the University of Central Florida (TJK), University of Central Florida College of Medicine (TJK),  
600 the Rolanette and Berdon Lawrence Bone Disease Program (TJK) and NIH grant AR057025 (RFJ).

601

602 **REFERENCES**

- 603 1. Mobasheri, A.L.I., Platt, N., Thorpe, C. & Shakibaei, M. Regulation of 2-Deoxy-d-Glucose  
604 Transport, Lactate Metabolism, and MMP-2 Secretion by the Hypoxia Mimetic Cobalt  
605 Chloride in Articular Chondrocytes. *Annals of the New York Academy of Sciences* **1091**,  
606 83-93 (2006).
- 607 2. Sacitharan, P.K. Ageing and Osteoarthritis. *Subcell Biochem* **91**, 123-159 (2019).
- 608 3. Mueller, M.B.M.D. & Tuan, R.S.P. Anabolic/Catabolic Balance in Pathogenesis of  
609 Osteoarthritis: Identifying Molecular Targets. *PM & R* **3**, S3-S11 (2011).
- 610 4. Sophia Fox, A.J., Bedi, A. & Rodeo, S.A. The basic science of articular cartilage: structure,  
611 composition, and function. *Sports Health* **1**, 461-468 (2009).
- 612 5. Kean, T.J. & Dennis, J.E. Synoviocyte Derived-Extracellular Matrix Enhances Human  
613 Articular Chondrocyte Proliferation and Maintains Re-Differentiation Capacity at Both  
614 Low and Atmospheric Oxygen Tensions. *PLoS one* **10**, e0129961 (2015).
- 615 6. Dennis, J.E., Splawn, T. & Kean, T.J. High-Throughput, Temporal and Dose Dependent,  
616 Effect of Vitamins and Minerals on Chondrogenesis. *Front Cell Dev Biol* **8**, 92 (2020).
- 617 7. Francis, S.L., Di Bella, C., Wallace, G.G. & Choong, P.F.M. Cartilage Tissue Engineering  
618 Using Stem Cells and Bioprinting Technology—Barriers to Clinical Translation. *Frontiers*  
619 *in Surgery* **5**(2018).
- 620 8. Whitney, G.A., *et al.* Thyroxine Increases Collagen Type II Expression and Accumulation  
621 in Scaffold-Free Tissue-Engineered Articular Cartilage. *Tissue Eng Part A* **24**, 369-381  
622 (2018).
- 623 9. Sato, K., Mera, H., Wakitani, S. & Takagi, M. Effect of epigallocatechin-3-gallate on the  
624 increase in type II collagen accumulation in cartilage-like MSC sheets. *Biosci Biotechnol*  
625 *Biochem* **81**, 1241-1245 (2017).

- 626 10. Gemmiti, C.V. & Guldberg, R.E. Fluid flow increases type II collagen deposition and  
627 tensile mechanical properties in bioreactor-grown tissue-engineered cartilage. *Tissue*  
628 *Eng* **12**, 469-479 (2006).
- 629 11. Booth, S.L. & Mayer, J. Skeletal functions of vitamin K-dependent proteins: not just for  
630 clotting anymore. *Nutrition reviews* **55**, 282-284 (1997).
- 631 12. Connor, W.E.  $\alpha$ -Linolenic acid in health and disease. *The American journal of clinical*  
632 *nutrition* **69**, 827-828 (1999).
- 633 13. Chin, K.Y. & Ima-Nirwana, S. The Role of Vitamin E in Preventing and Treating  
634 Osteoarthritis - A Review of the Current Evidence. *Front Pharmacol* **9**, 946 (2018).
- 635 14. Finch, C.W. Review of Trace Mineral Requirements for Preterm Infants: What Are the  
636 Current Recommendations for Clinical Practice? *Nutrition in Clinical Practice* **30**, 44-58  
637 (2015).
- 638 15. Koyano, Y., *et al.* Collagen and Proteoglycan Production by Bovine Fetal and Adult  
639 Chondrocytes Under Low Levels of Calcium and Zinc Ions. *Connective tissue research* **34**,  
640 213-225 (1996).
- 641 16. Litchfield, T.M., Ishikawa, Y., Wu, L.N., Wuthier, R.E. & Sauer, G.R. Effect of metal ions  
642 on calcifying growth plate cartilage chondrocytes. *Calcified tissue international* **62**, 341-  
643 349 (1998).
- 644 17. Kuterbekov, M., *et al.* Design of experiments to assess the effect of culture parameters  
645 on the osteogenic differentiation of human adipose stromal cells. *Stem Cell Research &*  
646 *Therapy* **10**, 256 (2019).
- 647 18. Enochson, L., Brittberg, M. & Lindahl, A. Optimization of a Chondrogenic Medium  
648 Through the Use of Factorial Design of Experiments. *BioResearch Open Access* **1**, 36-313  
649 (2012).
- 650 19. Han, F., *et al.* Transforming growth factor- $\beta$ 1 (TGF- $\beta$ 1) regulates ATDC5 chondrogenic  
651 differentiation and fibronectin isoform expression. *Journal of Cellular Biochemistry* **95**,  
652 750-762 (2005).
- 653 20. Jennifer L. Puetzer, J.N.P., Elizabeth G. Lobo. Comparative Review of Growth Factors  
654 for Induction of Three-Dimensional In Vitro Chondrogenesis in Human Mesenchymal  
655 Stem Cells Isolated from Bone Marrow and Adipose Tissue. *Tissue Engineering Part B:*  
656 *Reviews* **16**, 435-444 (2010).
- 657 21. Dennis, J.E., Whitney, G.A., Rai, J., Fernandes, R.J. & Kean, T.J. Physioxia Stimulates  
658 Extracellular Matrix Deposition and Increases Mechanical Properties of Human  
659 Chondrocyte-Derived Tissue-Engineered Cartilage. *Frontiers in bioengineering and*  
660 *biotechnology* **8**, 590743-590743 (2020).

- 661 22. Whitney, G.A., *et al.* Methods for Producing Scaffold-Free Engineered Cartilage Sheets  
662 from Auricular and Articular Chondrocyte Cell Sources and Attachment to Porous  
663 Tantalum. *BioResearch Open Access* **1**, 157-165 (2012).
- 664 23. Fernandes, R.J., Weis, M., Scott, M.A., Seegmiller, R.E. & Eyre, D.R. Collagen XI chain  
665 misassembly in cartilage of the chondrodysplasia (cho) mouse. *Matrix biology : journal*  
666 *of the International Society for Matrix Biology* **26**, 597-603 (2007).
- 667 24. McAlinden, A., *et al.* Molecular properties and fibril ultrastructure of types II and XI  
668 collagens in cartilage of mice expressing exclusively the alpha1(IIA) collagen isoform.  
669 *Matrix biology : journal of the International Society for Matrix Biology* **34**, 105-113  
670 (2014).
- 671 25. Fernandes, R.J., *et al.* Procollagen II amino propeptide processing by ADAMTS-3. Insights  
672 on dermatosparaxis. *The Journal of biological chemistry* **276**, 31502-31509 (2001).
- 673 26. Fernandes, R.J., Schmid, T.M. & Eyre, D.R. Assembly of collagen types II, IX and XI into  
674 nascent hetero-fibrils by a rat chondrocyte cell line. *European journal of biochemistry /*  
675 *FEBS* **270**, 3243-3250 (2003).
- 676 27. Santoro, A., *et al.* Choosing the right chondrocyte cell line: Focus on nitric oxide:  
677 Choosing the right chondrocyte cell line: focus. *Journal of orthopaedic research* **33**,  
678 1784-1788 (2015).
- 679 28. Thenet, S., Benya, P.D., Demignot, S., Feunteun, J. & Adolphe, M. SV40-immortalization  
680 of rabbit articular chondrocytes: Alteration of differentiated functions. *Journal of*  
681 *cellular physiology* **150**, 158-167 (1992).
- 682 29. Horton, W.E., *et al.* An established rat cell line expressing chondrocyte properties.  
683 *Experimental cell research* **178**, 457-468 (1988).
- 684 30. Steimberg, N., *et al.* SV40 Large T Antigen Expression Driven by col2a1 Regulatory  
685 Sequences Immortalizes Articular Chondrocytes but Does Not Allow Stabilization of Type  
686 II Collagen Expression. *Experimental cell research* **249**, 248-259 (1999).
- 687 31. Yoo, J.U., *et al.* The Chondrogenic Potential of Human Bone-Marrow-Derived  
688 Mesenchymal Progenitor Cells. *Journal of bone and joint surgery. American volume* **80**,  
689 1745-1757 (1998).
- 690 32. Penick, K.J., Solchaga, L.A. & Welter, J.F. High-throughput aggregate culture system to  
691 assess the chondrogenic potential of mesenchymal stem cells. *BioTechniques* **39**, 687-  
692 691 (2005).
- 693 33. Takahashi, T., *et al.* Three-dimensional microenvironments retain chondrocyte  
694 phenotypes during proliferation culture. *Tissue engineering* **13**, 1583-1592 (2007).

- 695 34. Benya, P.D. & Shaffer, J.D. Dedifferentiated chondrocytes reexpress the differentiated  
696 collagen phenotype when cultured in agarose gels. *Cell* **30**, 215-224 (1982).
- 697 35. Bonaventure, J., *et al.* Reexpression of Cartilage-Specific Genes by Dedifferentiated  
698 Human Articular Chondrocytes Cultured in Alginate Beads. *Experimental cell research*  
699 **212**, 97-104 (1994).
- 700 36. Tannous, B.A. Gaussia luciferase reporter assay for monitoring biological processes in  
701 culture and in vivo. *Nature protocols* **4**, 582-591 (2009).
- 702 37. Tannous, B.A., Kim, D.E., Fernandez, J.L., Weissleder, R. & Breakefield, X.O. Codon-  
703 optimized Gaussia luciferase cDNA for mammalian gene expression in culture and in  
704 vivo. *Molecular Therapy* **11**, 435-443 (2005).
- 705 38. Ruecker, O., Zillner, K., Groebner-Ferreira, R. & Heitzer, M. Gaussia-luciferase as a  
706 sensitive reporter gene for monitoring promoter activity in the nucleus of the green alga  
707 *Chlamydomonas reinhardtii*. *Molecular genetics and genomics : MGG* **280**, 153-162  
708 (2008).
- 709 39. Wurdinger, T., *et al.* A secreted luciferase for ex vivo monitoring of in vivo processes.  
710 *Nature methods* **5**, 171-173 (2008).
- 711 40. Badr, C.E., Hewett, J.W., Breakefield, X.O. & Tannous, B.A. A Highly Sensitive Assay for  
712 Monitoring the Secretory Pathway and ER Stress. *PloS one* **2**, e571-e571 (2007).
- 713 41. Pacifici, M., Cossu, G., Molinaro, M. & Tato, F. Vitamin A inhibits chondrogenesis but not  
714 myogenesis. *Experimental cell research* **129**, 469-474 (1980).
- 715 42. Barone, L.M., *et al.* Developmental expression and hormonal regulation of the rat matrix  
716 GLA protein (MGP) gene in chondrogenesis and osteogenesis. *Journal of cellular*  
717 *biochemistry* **46**, 351-365 (1991).
- 718 43. Sumitani, Y., *et al.* Inhibitory effect of retinoic acid receptor agonists on in vitro  
719 chondrogenic differentiation. *Anat Sci Int* **95**, 202-208 (2020).
- 720 44. Ren, F.L., *et al.* Effects of selenium and iodine deficiency on bone, cartilage growth plate  
721 and chondrocyte differentiation in two generations of rats. *Osteoarthritis and cartilage /*  
722 *OARS, Osteoarthritis Research Society* **15**, 1171-1177 (2007).
- 723 45. Hanrahan, G. & Lu, K. Application of Factorial and Response Surface Methodology in  
724 Modern Experimental Design and Optimization. *Critical reviews in analytical chemistry*  
725 **36**, 141-151 (2006).
- 726 46. Myers, R.H., Montgomery, D.C. & Anderson-Cook, C.M. *Response Surface Methodology:*  
727 *Process and Product Optimization Using Designed Experiments*, (John Wiley & Sons,  
728 Incorporated, New York, 2016).

- 729 47. Aydar, A.Y. Utilization of Response Surface Methodology in Optimization of Extraction of  
730 Plant Materials. (IntechOpen, 2018).
- 731 48. Yolmeh, M. & Jafari, S.M. Applications of Response Surface Methodology in the Food  
732 Industry Processes. *Food and bioprocess technology* **10**, 413-433 (2017).
- 733 49. Koç, B. & Kaymak-Ertekin, F. Response Surface Methodology and Food Processing  
734 Applications (Turkish with English Abstract). *Gıda*.
- 735 50. Renner, J.N. & Liu, J.C. Investigating the effect of peptide agonists on the chondrogenic  
736 differentiation of human mesenchymal stem cells using design of experiments.  
737 *Biotechnology progress* **29**, 1550-1557 (2013).
- 738 51. Kean, T.J. 1 cm<sup>2</sup> Biochamber. <https://3dprint.nih.gov/discover/3dpx-010438>  
739 **2022**(2019).
- 740 52. Day, E.K., Sosale, N.G. & Lazzara, M.J. Cell signaling regulation by protein  
741 phosphorylation: a multivariate, heterogeneous, and context-dependent process. *Curr*  
742 *Opin Biotechnol* **40**, 185-192 (2016).
- 743 53. Vermeulen, S., *et al.* Mechanotransduction is a context-dependent activator of TGF-beta  
744 signaling in mesenchymal stem cells. *Biomaterials* **259**, 120331 (2020).
- 745 54. Luo, J. & Li, P. Context-dependent transcriptional regulations of YAP/TAZ in stem cell  
746 and differentiation. *Stem Cell Res Ther* **13**, 10 (2022).
- 747 55. Shearer, M.J. & Newman, P. Recent trends in the metabolism and cell biology of vitamin  
748 K with special reference to vitamin K cycling and MK-4 biosynthesis. *Journal of Lipid*  
749 *Research* **55**, 345-362 (2014).
- 750 56. Kagan, V.E. & Tyurina, Y.Y. Recycling and Redox Cycling of Phenolic Antioxidants. *Annals*  
751 *of the New York Academy of Sciences* **854**, 425-434 (1998).
- 752 57. May, J.M., Qu, Z.-c., Neel, D.R. & Li, X. Recycling of vitamin C from its oxidized forms by  
753 human endothelial cells. *Biochimica et Biophysica Acta (BBA) - Molecular Cell Research*  
754 **1640**, 153-161 (2003).
- 755 58. Schurgers, L.J., Uitto, J. & Reutelingsperger, C.P. Vitamin K-dependent carboxylation of  
756 matrix Gla-protein: a crucial switch to control ectopic mineralization. *Trends in*  
757 *Molecular Medicine* **19**, 217-226 (2013).
- 758 59. Mansour, J.M. Biomechanics of Cartilage. in *Kinesiology: The Mechanics and*  
759 *Pathomechanics of Human Movement* (Lippincott Williams & Wilkins, 2009).



- 760 60. Patel, J.M., Wise, B.C., Bonnevie, E.D. & Mauck, R.L. A Systematic Review and Guide to  
761 Mechanical Testing for Articular Cartilage Tissue Engineering. *Tissue engineering. Part C,*  
762 *Methods* **25**, 593-608 (2019).
- 763 61. Kean, T.J., Ge, Z., Li, Y., Chen, R. & Dennis, J.E. Transcriptome-Wide Analysis of Human  
764 Chondrocyte Expansion on Synovioocyte Matrix. *Cells* **8**, 85 (2019).
- 765 62. Farndale, R.W., Sayers, C.A. & Barrett, A.J. A direct spectrophotometric microassay for  
766 sulfated glycosaminoglycans in cartilage cultures. *Connect Tissue Res* **9**, 247-248 (1982).
- 767 63. Makris, E.A., Hu, J.C. & Athanasiou, K.A. Hypoxia-induced collagen crosslinking as a  
768 mechanism for enhancing mechanical properties of engineered articular cartilage.  
769 *Osteoarthritis and Cartilage* **21**, 634-641 (2013).
- 770 64. Sardesai, V.M. Molybdenum: An Essential Trace Element. *Nutrition in clinical practice* **8**,  
771 277-281 (1993).
- 772 65. Mello, M.A. & Tuan, R.S. Effects of TGF-beta1 and triiodothyronine on cartilage  
773 maturation: in vitro analysis using long-term high-density micromass cultures of chick  
774 embryonic limb mesenchymal cells. *Journal of orthopaedic research* **24**, 2095-2105  
775 (2006).
- 776 66. Lind, T., *et al.* Vitamin a is a negative regulator of osteoblast mineralization. *PLoS one* **8**,  
777 e82388-e82388 (2013).
- 778 67. Masuda, E., Shirai, K., Maekubo, K. & Hirai, Y. A newly established culture method  
779 highlights regulatory roles of retinoic acid on morphogenesis and calcification of  
780 mammalian limb cartilage. *BioTechniques* **58**, 318-324 (2015).
- 781 68. Stabler, S.P. Vitamin B12 Deficiency. *The New England journal of medicine* **368**, 149-160  
782 (2013).
- 783 69. Tsonis, P.A. 1,25-dihydroxyvitamin D3 stimulates chondrogenesis of the chick limb bud  
784 mesenchymal cells. *Developmental biology* **143**, 130-134 (1991).
- 785 70. Wluka, A.E., Stuckey, S., Brand, C. & Cicuttini, F.M. Supplementary vitamin E does not  
786 affect the loss of cartilage volume in knee osteoarthritis: a 2 year double blind  
787 randomized placebo controlled study. *Journal of rheumatology* **29**, 2585-2591 (2002).
- 788 71. MayoClinic. Mayo Medical Laboratories Rochester Test Catalog.  
789 <https://www.mayocliniclabs.com/test-catalog/print-catalog.html> (2022).
- 790
